**When do elementary students need masks in school? Model-estimated risk of in-school SARS-CoV-2 transmission and related infections among household members before and after student vaccination**

John Giardina, MA

Alyssa Bilinski, PhD

Meagan C. Fitzpatrick, PhD

Emily A. Kendall, MD, PhD

Benjamin P. Linas, MD, MPH

Joshua Salomon, PhD

Andrea L. Ciaranello, MD, MPH

**Affiliations:**

**JG:** Center for Health Decision Science, Harvard T.H. Chan School of Public Health, Boston, MA

**AB:** Department of Health Services, Policy, and Practice and Department of Biostatistics, Brown School of Public Health, Providence, RI, USA

**MCF:** Center for Vaccine Development and Global Health, University of Maryland School of Medicine, Baltimore, MD

**EAK:** Division of Infectious Diseases, Johns Hopkins University School of Medicine, Baltimore, MD

**BPL:** Boston University Schools of Medicine and Public Health, Boston Medical Center, Boston, MA

**JS:** Center for Health Policy and Center for Primary Care and Outcomes Research, Stanford University School of Medicine, Stanford, CA

**ALC:** Division of Infectious Disease and Medical Practice Evaluation Center, Massachusetts General Hospital, Boston, MA, USA

## ABSTRACT

**Background** While CDC guidance for K-12 schools recommends indoor masking regardless of vaccination status, final decisions about masking in schools will be made at the local and state level. The impact of the removal of mask restrictions, however, on COVID-19 outcomes for elementary students, educators/staff, and their households is not well known.

**Methods** We used a previously published agent-based dynamic transmission model of SARS-CoV-2 in K-12 schools to simulate an elementary school with 638 students across 6 scenarios: combinations of three viral infectiousness levels (reflecting wild-type virus, alpha variant, and delta variant) and two student vaccination levels (0% and 50% coverage to reflect potential authorization in this age group). For each scenario, we varied observed community COVID-19 incidence (0 to 50 cases/100,000 people/day) and mitigation effectiveness (0-100% reduction to in-school secondary attack rate), and evaluated two outcomes over a 30 day period: (1) the probability of at least one in-school transmission, and (2) the increase in total cases among students, educators/staff, and their household members between in-person and remote instruction.

**Results** Over 30 days in the simulated elementary school, the probability of at least one in-school SARS-CoV-2 transmission and the number of projected infections in the immediate school community varied widely. In one scenario with the delta variant and no student vaccination, assuming that baseline mitigation measures of simple ventilation and handwashing reduce the secondary attack rate by 40%, if decision-makers seek to keep the monthly probability of an in-school transmission below 50%, additional mitigation (e.g., masking) would need to be added at a community incidence of approximately 4/100,000/day. Once students are vaccinated, thresholds shift substantially higher.

**Limitations** The interpretation of model results should be limited by the uncertainty in many of the parameters, including the effectiveness of individual mitigation interventions and vaccine efficacy against the delta variant, and the limited scope of the model beyond the school community. Additionally, the assumed case detection rate (33% of cases detected) may be too high in areas with decreased testing capacity.

**Conclusion** Despite the assumption of high adult vaccination, the risks of both in-school SARS-CoV-2 transmission and resulting infections among students, educators/staff, and their household members remain high when the delta variant predominates and students are unvaccinated. Mitigation measures or vaccinations for students when available can substantially reduce these risks. These findings underscore the potential role for responsive plans, where mitigation is deployed based on local COVID-19 incidence and vaccine uptake.

## INTRODUCTION

CDC guidance for K-12 schools recommends in-person education for all students, with COVID-19 mitigation measures including distancing, ventilation, and most recently, indoor masking regardless of vaccination status.<sup>1</sup> Children under 12 are not currently eligible for COVID-19 vaccines. Because CDC issues guidance rather than mandates, decisions will be made at the local and state level about masking in K-12 schools. In communities with high vaccination rates and low COVID-19 incidence, and in communities where masking is less widely accepted, schools are considering removing mask requirements, including for children <12. The impact of the removal of mask restrictions on COVID-19 outcomes for elementary students, educators/staff, and their households is not well known.

## METHODS

We used an agent-based dynamic transmission model of SARS-CoV-2 in K-12 schools. Model structure and data inputs are described in previous publications; Table S1 describes parameterization specific to this analysis.<sup>2</sup> We simulated an elementary school (30 separate classes, 638 students, 60 educators/staff) across 6 different scenarios: combinations of three viral infectiousness levels (reflecting wild-type virus, alpha variant, and delta variant) and two student vaccination levels (0% and 50% coverage to reflect potential authorization in this age group). We assumed that 70% of adults (educators/staff and adult household members of both students and educators/staff) were vaccinated.

We evaluated two primary outcomes of interest over a 30-day period: 1) probability of any in-school SARS-CoV-2 transmission, and 2) increase in the number of total infections among students, educators/staff, and their household members (“immediate school community”) between in-school and remote instruction. For each scenario, we varied observed community COVID-19 incidence (0 to 50 cases/100,000 people/day, 33% of cases detected) and mitigation effectiveness (0-100% reduction to in-

school SAR). The full multilayer mitigation measures recommended in 2020-21 reduced wild-type SAR by 90-100%.<sup>1,3</sup> Without clinical data for individual mitigation measure effectiveness, we show examples based on particle and aerosol studies and expert opinion as an approximate estimate; these ranges are highly uncertain (Supplemental Table). (Additional outcomes, including hospitalizations in the immediate school community, and scenarios varying vaccine uptake among adults, are available online at <https://github.com/abilinski/BackToSchool2/tree/master/5 - Drafts/Paper 3.>)

## RESULTS

Over 30 days in the simulated elementary school, the probability of at least one in-school SARS-CoV-2 transmission and the total number of projected infections in the immediate school community varied widely (Figures 1 and 2). Assuming that simple ventilation and handwashing are 40% effective, with the delta variant and no student vaccination, if decision-makers seek to keep the monthly probability of an in-school transmission below 50%, additional mitigation (e.g., masking) would need to be added at a community incidence of approximately 4/100,000/day (Figure 1, blue shaded areas). Using a more lenient threshold, to maintain total additional infections in the immediate school community below an average of 10 per month, masks would be needed at a community incidence of approximately 16/100,000/day (Figure 2, blue shaded areas); the community incidence cutoff is lower at more conservative thresholds (e.g., 8/100,000/day for an average of 5 cases per month). Once students are vaccinated, thresholds shift substantially higher.

## DISCUSSION

Despite high adult vaccination, the risks of both in-school SARS-CoV-2 transmission and resulting infections among students, educators/staff, and their household members remain high when the delta variant predominates and students are unvaccinated. Mitigation measures or vaccinations for students

when available can substantially reduce these risks. Risks related to SARS-CoV-2 infection are only one of many factors guiding K-12 school planning, and interpretation of model results should be limited by the uncertainty in many of the parameters, including the effectiveness of individual mitigation interventions and vaccine efficacy against the delta variant, and the limited scope of the model beyond the school community.<sup>4</sup> In addition, the assumed case detection rate of 33% may be too high in areas with decreased testing capacity. Recommended thresholds can be scaled accordingly; for example, in an area with 16.5% detection, a threshold of 4 cases/100,000 would become 2 cases/100,000. These findings underscore the potential role for responsive plans, where mitigation is deployed based on local COVID-19 incidence and vaccine uptake.

#### **FUNDING:**

The authors were supported by the Centers for Disease Control and Prevention through the Council of State and Territorial Epidemiologists (NU38OT000297-02: AB, JAS), the National Institute of Allergy and Infectious Diseases (R37AI058736-16S1: AC; K01AI141576: MCF; and K08127908: EAK), the National Institute on Drug Abuse (3R37DA01561217S1: JAS), and Facebook (unrestricted gift; JG, AB, JAS). The papers' contents are solely the responsibility of the authors and do not represent the official views of the funders.

#### **DISCLOSURES:**

The authors have no disclosures.

#### **ACKNOWLEDGEMENTS:**

We are grateful to Dr. Sandra B. Nelson and Dr. Shira Doron for expert opinion on mitigation measure effectiveness.

## FIGURE LEGENDS

**Figure 1 legend:** The blue-to-yellow color scale depicts the smoothed model-predicted probability of at least one in-school SARS-CoV-2 transmission over a 30-day period. Panels reflect increasingly transmissible variants from left to right and increasing student vaccination coverage from top to bottom. All panels reflect 70% vaccine uptake among adults (educators/staff and adult members of student and educator/staff households). The horizontal axis shows observed community COVID-19 incidence in cases/100,000 people per day. The vertical axis shows mitigation effectiveness, applied as a relative risk reduction to the fully unmitigated attack rate for each variant. Bands of mitigation effectiveness reflect approximate assumptions for three types of interventions: A includes simple ventilation and handwashing only; B adds universal masking of students and educators/staff to A; C reflects the full package of interventions widely used in the 2020-21 school year (adding distancing, daily surface cleaning, cohorting, and restrictions on shared items). The contour lines represent thresholds for different probability levels; probabilities are lower than the threshold above the contour line and higher below it. The arrows indicate the community COVID-19 incidence rate at which a school might opt to move to the next more intensive mitigation strategy (i.e., 40% to 70% and 80% to 90% effectiveness), if the goal is to maintain the probability of the one in-school transmission per month below 50%.

**Figure 2 legend:** The blue-to-yellow color scale depicts the smoothed average additional number of model-predicted infections over 30 days among members of the immediate school community (defined as students, educators/staff, and their household members) with in-person learning compared to a counterfactual scenario of remote-only learning. These are shown because decision-makers may tolerate some risk of in-school transmissions (Figure 1) but may wish to avoid a large increase in total infections among members of the immediate school community. Panels reflect increasingly transmissible variants from left to right and increasing student vaccination coverage from top to bottom. All panels reflect 70% vaccine uptake among adults (educators/staff and adult members of student and educator/staff households). The horizontal axis shows observed community COVID-19 incidence in cases/100,000 people per day. The vertical axis shows mitigation effectiveness, applied as a relative risk reduction to the fully unmitigated attack rate for each variant. Bands of mitigation effectiveness reflect approximate assumptions for three types of interventions: A includes simple ventilation and handwashing only; B adds universal masking of students and educators/staff to A; C reflects the full package of interventions widely used in the 2020-21 school year (adding distancing, daily surface cleaning, cohorting, and restrictions on shared items). The contour lines represent thresholds for different numbers of average predicted cases; numbers are lower than the threshold above the contour line and higher below it. The arrows indicate the community COVID-19 incidence rate at which a school might opt to move to the next more intensive mitigation strategy (i.e., 40% to 70% and 80% to 90% effectiveness), if the goal is to maintain the total number of additional infections in the immediate school community below 10 in a 30-day period.

**Figure 1: Model-predicted probability of at least one in-school SARS-CoV-2 transmission over 30 days in a simulated elementary school setting.**

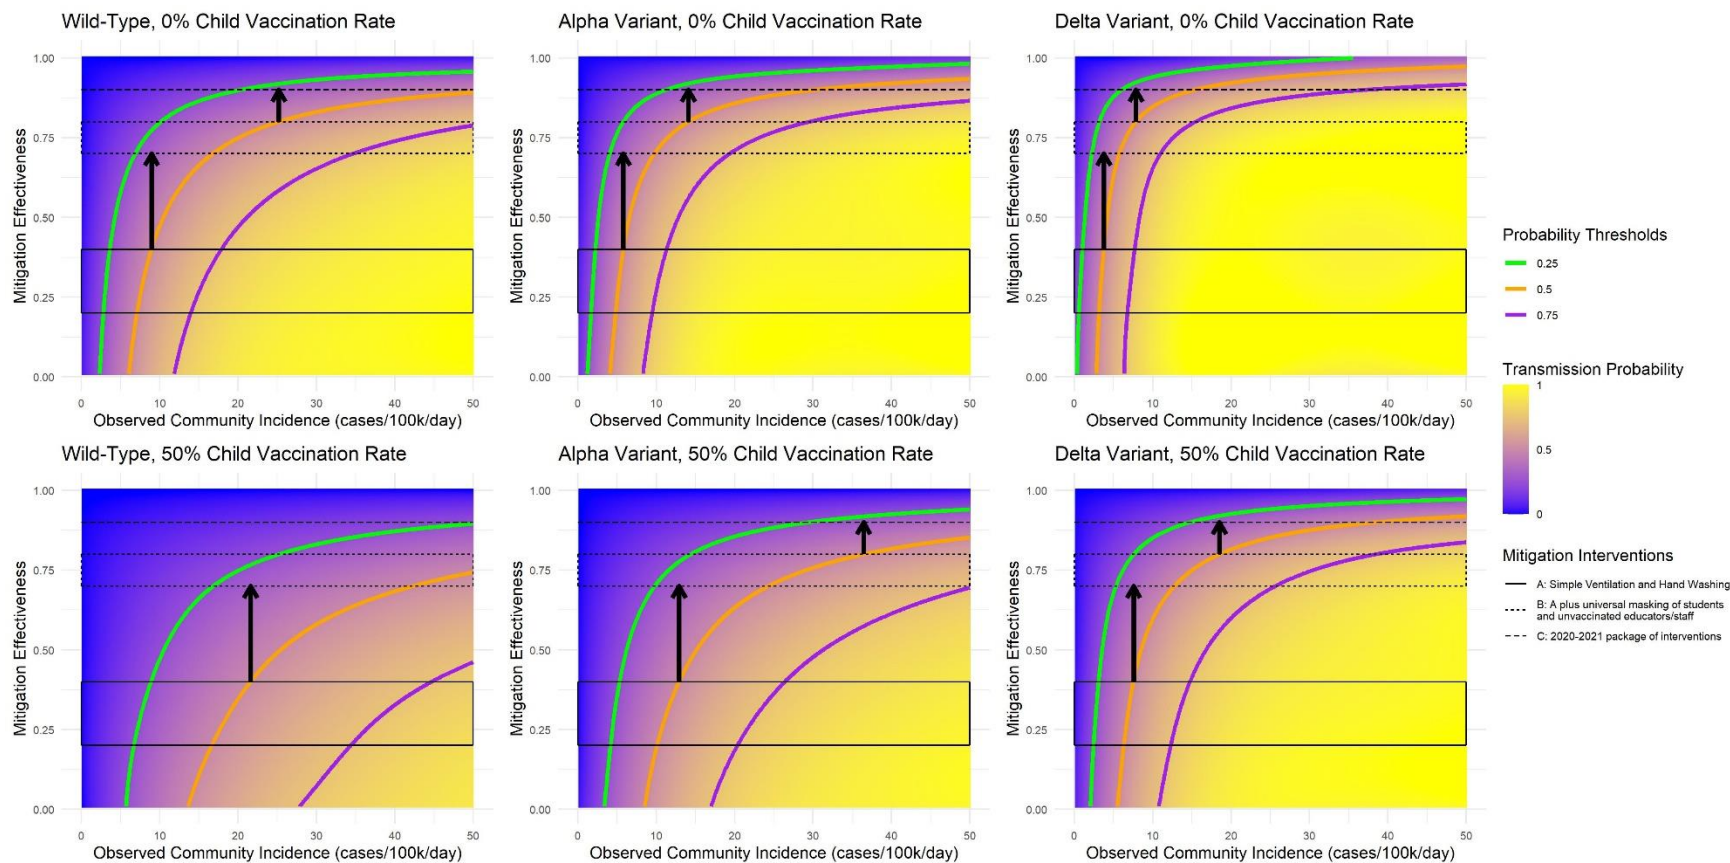



**Figure 2: Model-predicted average number of additional cases over 30 days in the immediate school community (students, educators/staff, and their household members) during in-person instruction compared to remote instruction in the simulated elementary school setting.**

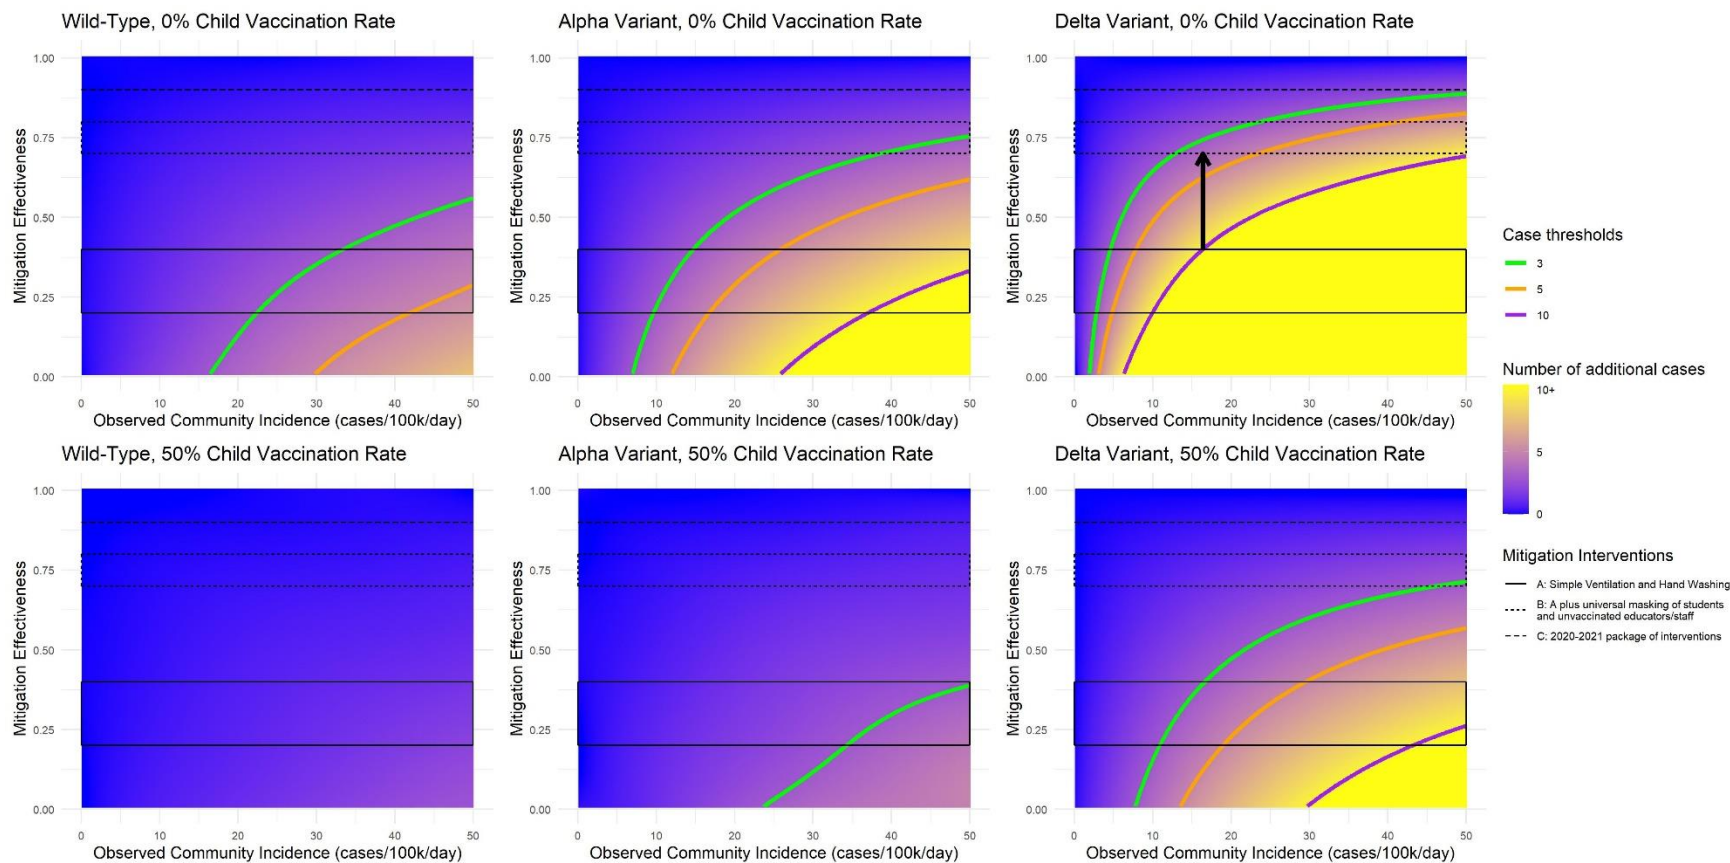



## REFERENCES

1. Centers for Disease Control and Prevention. Guidance for COVID-19 Prevention in K-12 Schools. Published July 9, 2021. Accessed July 16, 2021. <https://www.cdc.gov/coronavirus/2019-ncov/community/schools-childcare/k-12-guidance.html>
2. Bilinski A, Salomon JA, Giardina J, Ciaranello A, Fitzpatrick MC. Passing the Test: A Model-Based Analysis of Safe School-Reopening Strategies. *Ann Intern Med*. Published online June 8, 2021:M21-0600. doi:10.7326/M21-0600
3. Centers for Disease Control and Prevention. Science Brief: Transmission of SARS-CoV-2 in K-12 Schools and Early Care and Education Programs. Centers for Disease Control and Prevention. Published July 9, 2021. Accessed July 28, 2021. [https://www.cdc.gov/coronavirus/2019-ncov/science/science-briefs/transmission\\_k\\_12\\_schools.html](https://www.cdc.gov/coronavirus/2019-ncov/science/science-briefs/transmission_k_12_schools.html)
4. Lopez Bernal J, Andrews N, Gower C, et al. Effectiveness of Covid-19 Vaccines against the B.1.617.2 (Delta) Variant. *New England Journal of Medicine*. 2021;0(0). doi:[10.1056/NEJMoa2108891](https://doi.org/10.1056/NEJMoa2108891)

## **SUPPLEMENT: “When do elementary students need masks in school? Model-estimated risk of in-school SARS-CoV-2 transmission and related infections among household members before and after student vaccination”**

John Giardina, MA  
Alyssa Bilinski, PhD  
Meagan C. Fitzpatrick, PhD  
Emily A. Kendall, MD, PhD  
Benjamin P. Linas, MD, MPH  
Joshua Salomon, PhD  
Andrea L. Ciaranello, MD, MPH

### **Table of Contents**

|            |       |
|------------|-------|
| Table S1   | 2-4   |
| Methods    | 5-6   |
| Table S2   | 7     |
| Figure S1  | 8     |
| Figure S2  | 9     |
| Figure S3  | 10    |
| Figure S4  | 11    |
| Figure S5  | 12    |
| Figure S6  | 13    |
| Figure S7  | 14    |
| Figure S8  | 15    |
| Figure S9  | 16    |
| Figure S10 | 17    |
| Figure S11 | 18    |
| Figure S12 | 19    |
| Figure S13 | 20    |
| Figure S14 | 21    |
| Figure S15 | 22    |
| Figure S16 | 23    |
| References | 24-25 |

**Table S1. Selected input parameters for agent-based dynamic transmission model of 30-day SARS-CoV-2 outcomes in elementary schools**

|                                                                         | Values                                                                                 | Source                                                     |
|-------------------------------------------------------------------------|----------------------------------------------------------------------------------------|------------------------------------------------------------|
| <b>Adult-to-adult daily attack rate*</b>                                |                                                                                        |                                                            |
| Wild type                                                               | 2.0%                                                                                   | See below                                                  |
| Alpha                                                                   | 3.5%                                                                                   | See below                                                  |
| Delta                                                                   | 7.0%                                                                                   | See below                                                  |
| <b>Infectiousness (relative to symptomatic adults)</b>                  |                                                                                        |                                                            |
| Student                                                                 | 0.5                                                                                    | Baseline model parameter from Bilinski et al. <sup>1</sup> |
| Asymptomatic adult                                                      | 0.5                                                                                    |                                                            |
| <b>Susceptibility (relative to adults)</b>                              |                                                                                        |                                                            |
| Student                                                                 | 0.5                                                                                    | Baseline model parameter from Bilinski et al. <sup>1</sup> |
| <b>Infectious period</b>                                                |                                                                                        |                                                            |
| All Individuals                                                         | Lognormal (5,2)                                                                        | Baseline model parameter from Bilinski et al. <sup>1</sup> |
| <b>Hospitalization risk after SARS-CoV-2 infection**</b>                |                                                                                        |                                                            |
| Student                                                                 | 0.29% (for 0% vaccine uptake)<br>0.26% (for 50% vaccine uptake)                        | See below                                                  |
| Adult                                                                   | 1.93%                                                                                  | See below                                                  |
| <b>Vaccine uptake</b>                                                   |                                                                                        |                                                            |
| Student                                                                 | 0% and 50%                                                                             | Assumption                                                 |
| Adult                                                                   | 70%                                                                                    | Assumption                                                 |
| <b>Vaccine Effectiveness</b>                                            |                                                                                        |                                                            |
| All Individuals                                                         | 90% reduction in infection risk                                                        | CDC <sup>2</sup>                                           |
| <b>Risk of Community Exposure</b>                                       |                                                                                        |                                                            |
| Student                                                                 | 3 times observed community incidence rate                                              | Assumption                                                 |
| Adults                                                                  | 3 times observed community incidence, divided by fraction of population susceptible*** | Assumption                                                 |
| <b>Mitigation effectiveness****</b>                                     |                                                                                        |                                                            |
| A: Simple ventilation and handwashing                                   | 20-40%                                                                                 | See below                                                  |
| B: A, plus universal masking of elementary students and educators/staff | 70-80%                                                                                 | See below                                                  |
| C: "2020-2021 package of interventions"                                 | 90-100%                                                                                | See below                                                  |

\* Adult-to-adult daily attack rate: Based on calibration analyses described in previous work (Bilinski et al.<sup>1</sup>), the adult-to-adult wild-type variant attack rate was assumed to be 2% per day. This is also consistent with data from school settings with minimal mitigation; a lower-bound estimate from CDC data suggest a total in-school attack rate of 11%,<sup>3</sup> corresponding to a daily attack rate near 2% (assuming a constant daily attack rate over a 5 day infectiousness period). The transmissibility of the alpha variant is estimated at 59% higher than wild type in the US,<sup>4</sup> so we assumed a daily attack rate of 3.5%. The delta attack rate has been estimated at 60% higher than that for the alpha variant in a setting with high vaccine uptake,<sup>5</sup> and a case study of a recent outbreak in a largely unvaccinated population reported an overall household delta attack rate of 53%,<sup>6</sup> corresponding to a daily attack rate of approximately 7% per school day (again assuming a 5 day infectiousness period and an in-school attack rate approximately half the household attack rate). In order to reflect the baseline attack rate, the estimate from the largely unvaccinated population was used. The student-to-student daily attack rate was assumed to be one-quarter of the adult-to-adult rate to reflect the assumption that students are both 50% less infectious and 50% less susceptible to infection.

\*\* Hospitalization risk following SARS-CoV-2 infection: The hospitalization risk among unvaccinated patients with SARS-CoV-2 was assumed to be the overall infection fatality rate divided by the mortality rate among hospitalized patients, using estimates provided by the CDC for use in COVID-19 models<sup>7</sup>; the 0-17 year old age group (20/million IFR; 0.7% hospitalized mortality rate) was used for the student estimate and the 18-49 year old age group (500/million IFR; 2.1% hospitalized mortality rate) was used for the adult estimate. The overall hospitalization risk among both unvaccinated and vaccinated patients was calculated using the vaccine coverage scenarios implemented in the model and assuming that the risk of infection in vaccinated individuals was 90% lower than the risk in unvaccinated individuals. Adult values applied to educators/staff and to adult household members of both students and educators/staff. The 2% hospitalization rate used for adults is similar to inputs in other models, such as the low estimate used by Lemaitre et al.<sup>8</sup>

\*\*\* Risk of community exposure was inflated by the fraction of population susceptible (i.e., unvaccinated and potential breakthrough cases), so that actual case rate among adults matches the assumed community incidence rate.

\*\*\*\* Mitigation measures:

**A:** Simple ventilation and handwashing: open windows if present, portable air filters, maintain existing HVAC systems, and regular handwashing. Vouriot et al.<sup>9</sup> estimate that seasonal changes in ventilation increase secondary infections by 30-40% in fall and 80-90% in winter relative to summer, but note there is wide variation based on classroom activities. If an intervention replicates summer-levels of ventilation, this would correspond to a 23-29% reduction in the attack rate in the fall and a 44-47% reduction in the winter. Burrigge et al.<sup>10</sup> also present a wide range of studies on ventilation and surface cleaning, some of which show good ventilation (i.e., opening windows) could reduce the risk of infections by about half in an office setting (which is often less active than a classroom). Data from airflow studies estimate reduction in exposure to aerosols of 65% with portable HEPA filters.<sup>11</sup> Combining these data, we estimated a range of 20-40% risk reduction (since most classrooms will not have access to portable air cleaners).

**B:** Intervention in A, plus universal masking: a policy of masking all students and educators/staff, accounting for the impact of imperfect adherence and technique. The IHME COVID-19 Forecasting Team conducted a meta-analysis that estimated using non-medical masks was associated with a 43% or 35% reduction in respiratory virus infection risk.<sup>12</sup> Additively combining these risk reductions with the risk reductions in the group A interventions generated the assumed range of 70-80% effectiveness for this group of interventions. It should be noted that, though, that there is large uncertainty in this effect, and the effectiveness will likely depend on the specific context of mask use. For example, some non-school case studies suggest reductions in infection risk of 70-

79% with masking.<sup>13</sup> Data from studies of simulated respiratory particles demonstrate fitted filtration efficiency values (proportion of particles kept behind a mask) of 50-79% with cloth masks.<sup>14,15</sup>

**C:** Combination interventions as implemented in many settings in the 2020-2021 school year: Includes B, plus physical distancing of 3-6 feet when masked and >6 when unmasked, daily cleaning of surfaces, restrictions on shared items, and cohorting of students.<sup>16</sup> This is the assumed maximum mitigation effect. CDC reports very effective in-school mitigation when the full package of interventions are implemented,<sup>14</sup> including those from Falk et al.<sup>17</sup> and Zimmerman et al.<sup>18</sup> Many studies reported total in-school secondary attack rates of 0.5-1.0% with implementation of this package of interventions; this corresponds to a 93% reduction on the unmitigated wild-type SAR. While clinical data are available for C, data about the effectiveness of A and B were derived from limited data cited above, as well as expert opinion, and should be used only as approximations to estimate the impact of individual mitigation interventions.

Model code and additional information on the methods used are available at:

<https://github.com/abilinski/BackToSchool2/tree/master/3 - Scripts/Paper 3> (code) and

<https://github.com/abilinski/BackToSchool2/tree/master/5 - Drafts/Paper 3> (methods description).

## Methods

To generate Figures 1 and 2, we generated 550,000 paired samples of observed community incidence and mitigation effectiveness using Latin hypercube sampling to draw from a joint independent uniform distribution with limits of 0 to 60 case notifications/100k/day and 0 to 100% mitigation. For each scenario in each paired sample, we ran the model presented in Bilinski et al.<sup>1</sup> using the model code available at <https://github.com/abilinski/BackToSchool2/tree/master/3 - Scripts/Paper 3>, varying the following parameters: (1) baseline daily adult-to-adult secondary attack rates of 2% (reflecting the wild-type virus), 3.5% (alpha variant), and 7% (delta variant); (2) child vaccination coverage of 0% and 50%; (3) adult vaccination coverage of 50% and 70%; and (4) remote and in-school instruction. We assumed reduced transmission and susceptibility for children and for asymptomatic adults (Table S1). To calculate in-school transmissions presented in Figure 1, we analyzed only model runs for in-person instruction and calculated the number of transmissions occurring in the school building (classrooms, staff rooms, and random interactions). To calculate average additional infections among the immediate school community during in-school instruction relative to remote instruction, for each paired sample, we subtracted the total number of infections during remote instruction from the number of total infections during in-school instruction.

To generate smoothed heatmaps and associated contour line estimates, we fit regressions to the raw model output for each outcome and associated scenario (e.g., more than one in-school transmission in the wild-type, 0% child vaccine, 70% adult vaccine scenario) as a function of observed community incidence and mitigation effectiveness. We tested five specifications: linear, quadratic, cubic, and quartic polynomials, as well as linear regression with a log transformation on each predictor:

- Linear specification:  $Outcome = \beta_0 + \beta_1 Incidence + \beta_2 Mitigation + \beta_3 Incidence * Mitigation$
- Quadratic specification:  $Outcome = \sum_{k=0}^2 \sum_{l=0}^2 \beta_{k,l} Incidence^k * Mitigation^l$
- Cubic specification:  $Outcome = \sum_{k=0}^3 \sum_{l=0}^3 \beta_{k,l} Incidence^k * Mitigation^l$
- Quartic specification:  $Outcome = \sum_{k=0}^4 \sum_{l=0}^4 \beta_{k,l} Incidence^k * Mitigation^l$
- Log specification:  $Outcome = \beta_0 + \beta_1 \ln Incidence + \beta_2 \ln Mitigation + \beta_3 \ln Incidence * \ln Mitigation$

For each scenario, we selected the regression which minimized the root mean-squared prediction error in a hold-out test set containing 55,000 (10%) of the samples.

To assess how well the smoothing functions fit the expected value of the model output, we calculated the  $R^2$  between binned averages of the model-generated outcomes in an out-of-sample test set and the average outcome predicted by the selected smoothing function across the range of community incidence and mitigation values. We evaluated the fit for two different bin sizes: “large” bins, with a bin width of 5 for community incidence and 0.1 for mitigation effectiveness, and “small” bins with a bin width of 1 for community incidence and 0.1 for mitigation effectiveness (Table S2). While noise persists in the additional infections outcome for scenarios with lower infection rates (wild type and alpha) due to a larger relative impact of model stochasticity (which is more pronounced in the small bins), these do not impact the substantive conclusions presented in the letter. For additional context on the smoothing process, we present empirical and smoothed bin estimates (for both bin sizes) for the additional infections outcome in Figures S5-S8; raw binned heatmaps are presented in Figures S9-S16. Figures S5-



S8 show that despite stochasticity, the smoothing functions used for the heatmaps (Figures 1-2, S1-S2) do not deviate from the raw model output in a way that impacts letter conclusions.

**Table S2. Test sample R<sup>2</sup> for heatmap smoothing functions.** Estimates of R<sup>2</sup> were made on an out-of-sample test set.

| Outcome                                            | Adult Vaccination | Child Vaccination | Variant       | R <sup>2</sup> with Binned Model Output |            |
|----------------------------------------------------|-------------------|-------------------|---------------|-----------------------------------------|------------|
|                                                    |                   |                   |               | Large Bins                              | Small Bins |
| Probability of at least one in-school transmission | 70%               | 0%                | Delta Variant | 0.99                                    | 0.97       |
|                                                    |                   |                   | Alpha Variant | >0.99                                   | 0.98       |
|                                                    |                   |                   | Wild-type     | >0.99                                   | 0.98       |
|                                                    |                   | 50%               | Delta Variant | >0.99                                   | 0.98       |
|                                                    |                   |                   | Alpha Variant | >0.99                                   | 0.98       |
|                                                    |                   |                   | Wild-type     | 0.99                                    | 0.97       |
|                                                    | 50%               | 0%                | Delta Variant | 0.99                                    | 0.97       |
|                                                    |                   |                   | Alpha Variant | 0.99                                    | 0.98       |
|                                                    |                   |                   | Wild-type     | >0.99                                   | 0.99       |
|                                                    |                   | 50%               | Delta Variant | 0.99                                    | 0.98       |
|                                                    |                   |                   | Alpha Variant | >0.99                                   | 0.98       |
|                                                    |                   |                   | Wild-type     | >0.99                                   | 0.98       |
| Additional cases in school community               | 70%               | 0%                | Delta Variant | >0.99                                   | 0.98       |
|                                                    |                   |                   | Alpha Variant | 0.98                                    | 0.92       |
|                                                    |                   |                   | Wild-type     | 0.94                                    | 0.74       |
|                                                    |                   | 50%               | Delta Variant | 0.98                                    | 0.91       |
|                                                    |                   |                   | Alpha Variant | 0.92                                    | 0.64       |
|                                                    |                   |                   | Wild-type     | 0.71                                    | 0.29       |
|                                                    | 50%               | 0%                | Delta Variant | >0.99                                   | 0.99       |
|                                                    |                   |                   | Alpha Variant | 0.99                                    | 0.93       |
|                                                    |                   |                   | Wild-type     | 0.95                                    | 0.79       |
|                                                    |                   | 50%               | Delta Variant | 0.98                                    | 0.92       |
|                                                    |                   |                   | Alpha Variant | 0.92                                    | 0.69       |
|                                                    |                   |                   | Wild-type     | 0.72                                    | 0.34       |

## Supplemental Figures

**Figure S1. Model-predicted probability of at least one in-school SARS-CoV-2 transmission over 30 days in a simulated elementary school setting, with 50% ADULT VACCINATION COVERAGE.** This figure replicates Figure 1, with 50% adult vaccination coverage in contrast to 70%. Note that the observed community incidence cutoff for the 50% transmission threshold in the delta variant scenario with a 0% child vaccination rate is about 4/100,000/day. Also note that the model does not directly account for the effect of adult vaccination levels on observed community incidence – a community with lower vaccination rates is likely to be at a higher community incidence (i.e., to the right on the x-axis) and vice versa.

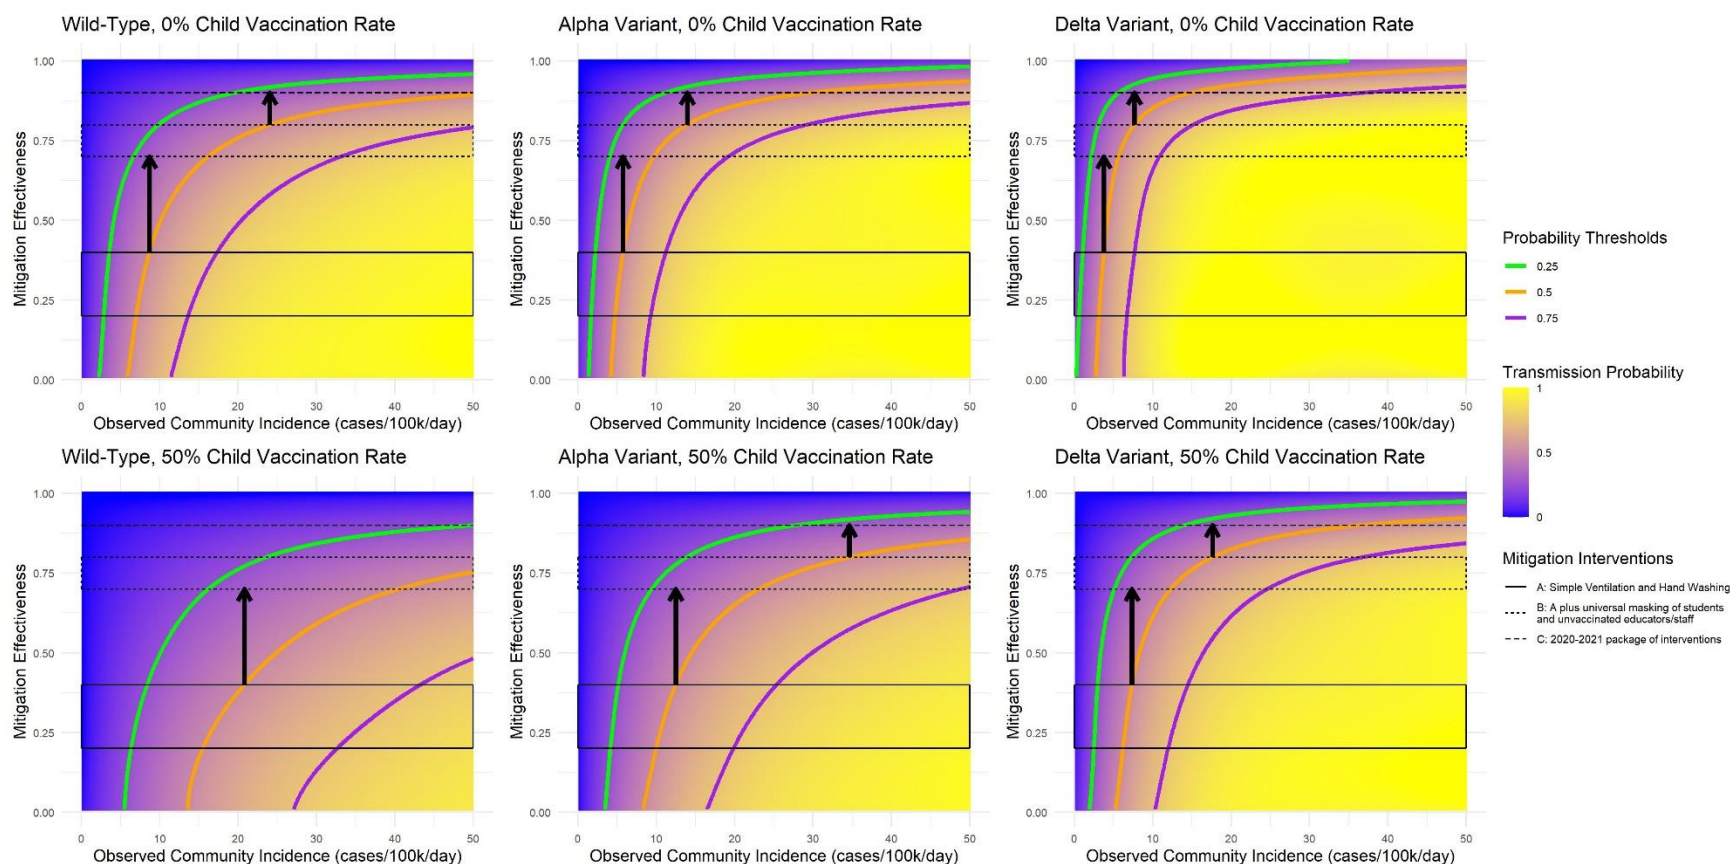

**Figure S2. Model-predicted average number of additional cases over 30 days in the immediate school community (students, educators/staff, and their household members) during in-person instruction compared to remote instruction in the simulated elementary school setting, with 50% ADULT VACCINATION COVERAGE.** This figure replicates Figure 2, with 50% adult vaccination coverage in contrast to 70%. Note that the observed community incidence cutoffs for the 5 and 10 additional cases thresholds in the delta variant scenario with a 0% child vaccination rate are about 15/100,000/day and 7/100,000/day, respectively. Also note that the model does not directly account for the effect of adult vaccination levels on observed community incidence – a community with lower vaccination rates is likely to be at a higher community incidence (i.e., to the right on the x-axis) and vice versa.

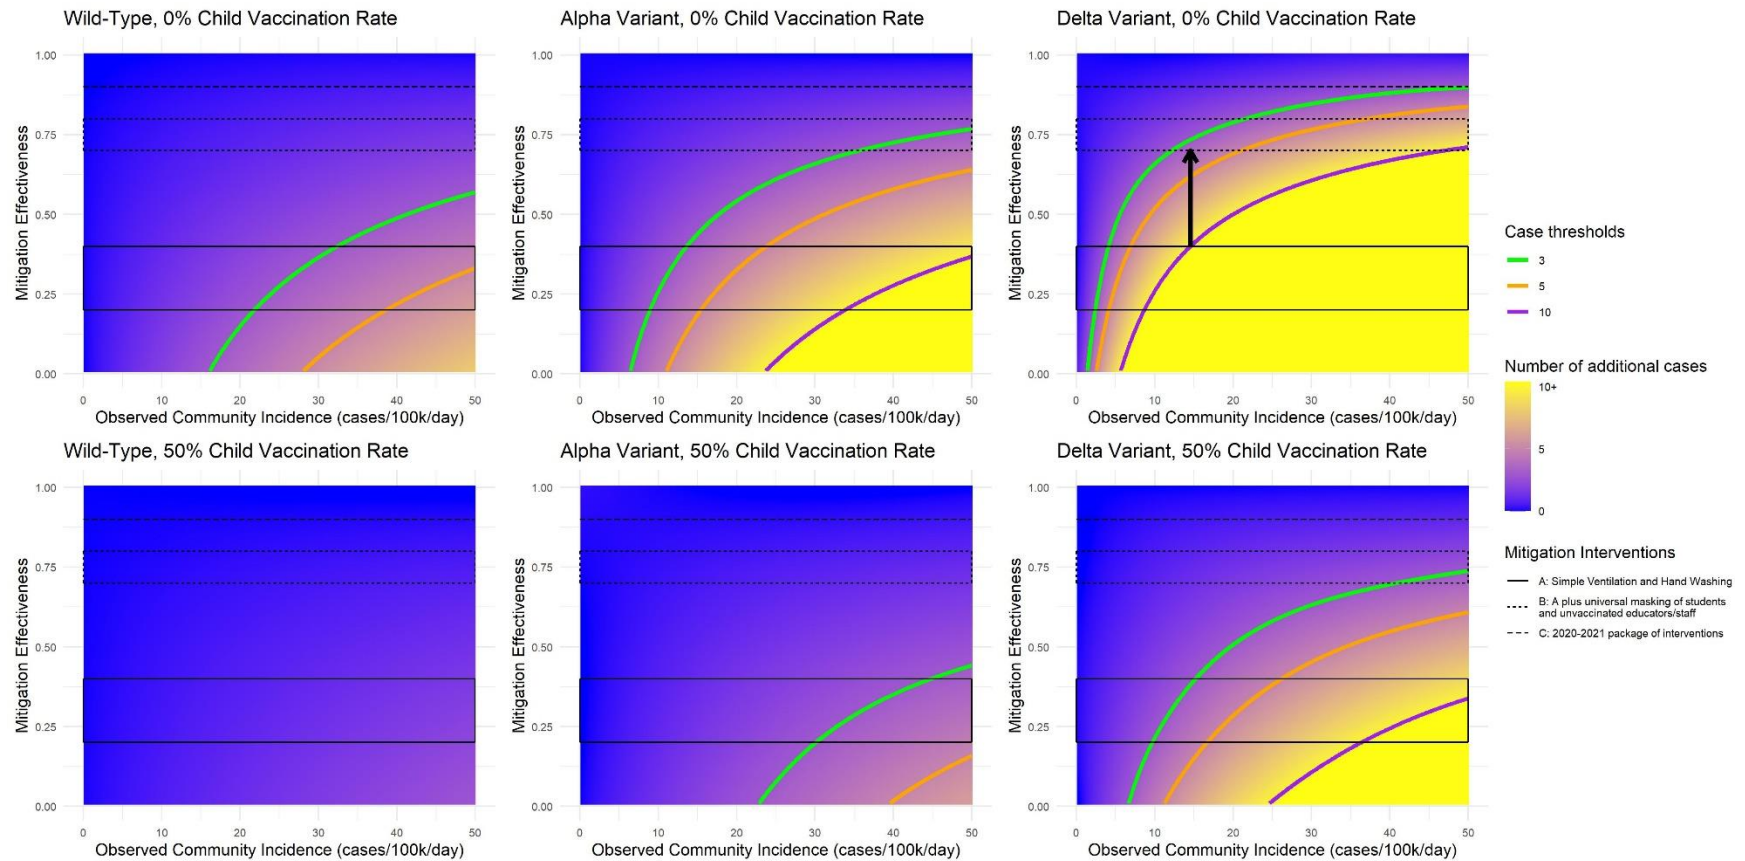

**Figure S3. Average increase in hospitalizations among parents, teachers, staff, and adult family members per 100k, relative to remote instruction, with 70% adult vaccination.**

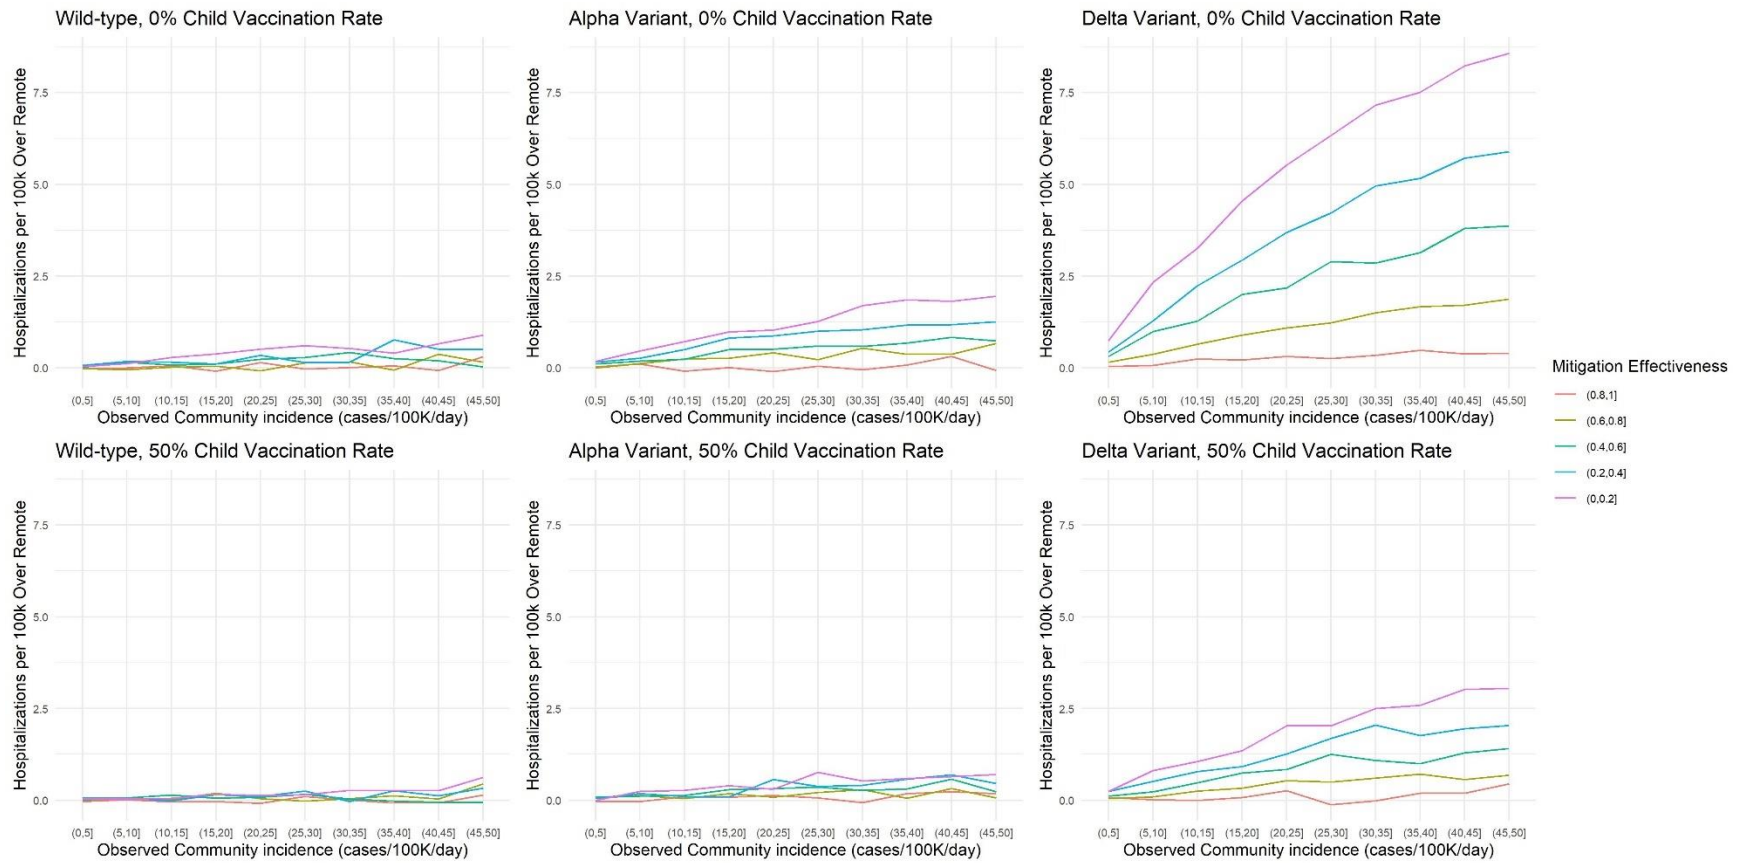

**Figure S4. Average increase in hospitalizations among parents, teachers, staff, and adult family members per 100k, relative to remote instruction, with 50% adult vaccination**

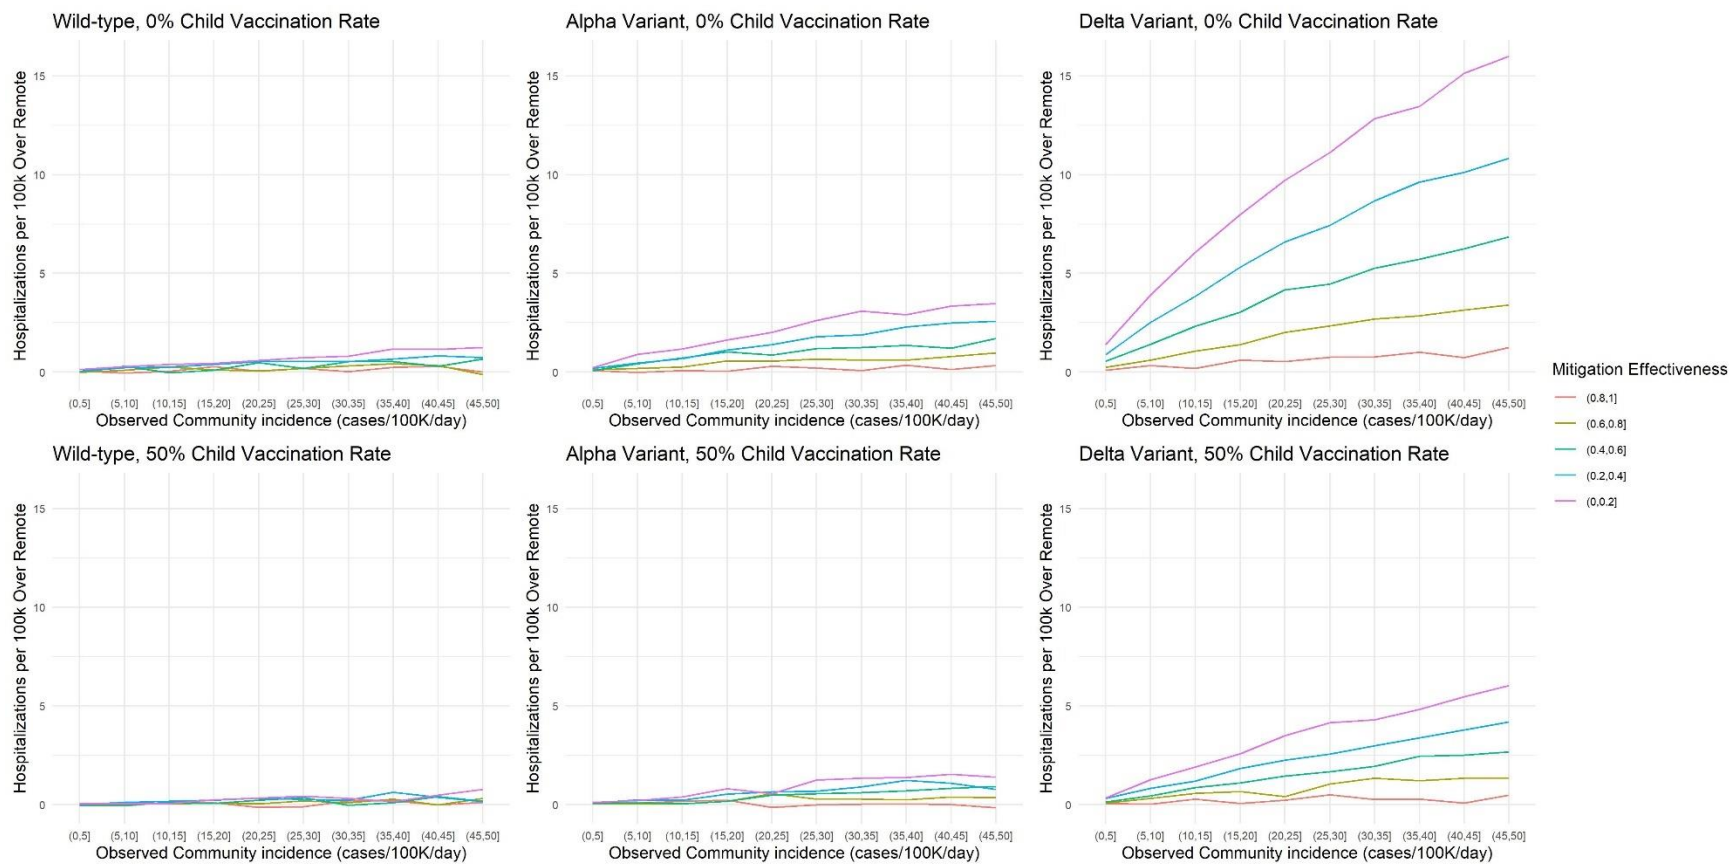



**Figure S5. Model-predicted average number of additional cases over 30 days in the immediate school community (students, educators/staff, and their household members) during in-person instruction compared to remote instruction in the simulated elementary school setting, with 70% ADULT VACCINATION COVERAGE.** This figure includes both the raw binned averages of the model output for large bins and the smoothed estimates for each bin (calculated at the midpoint).

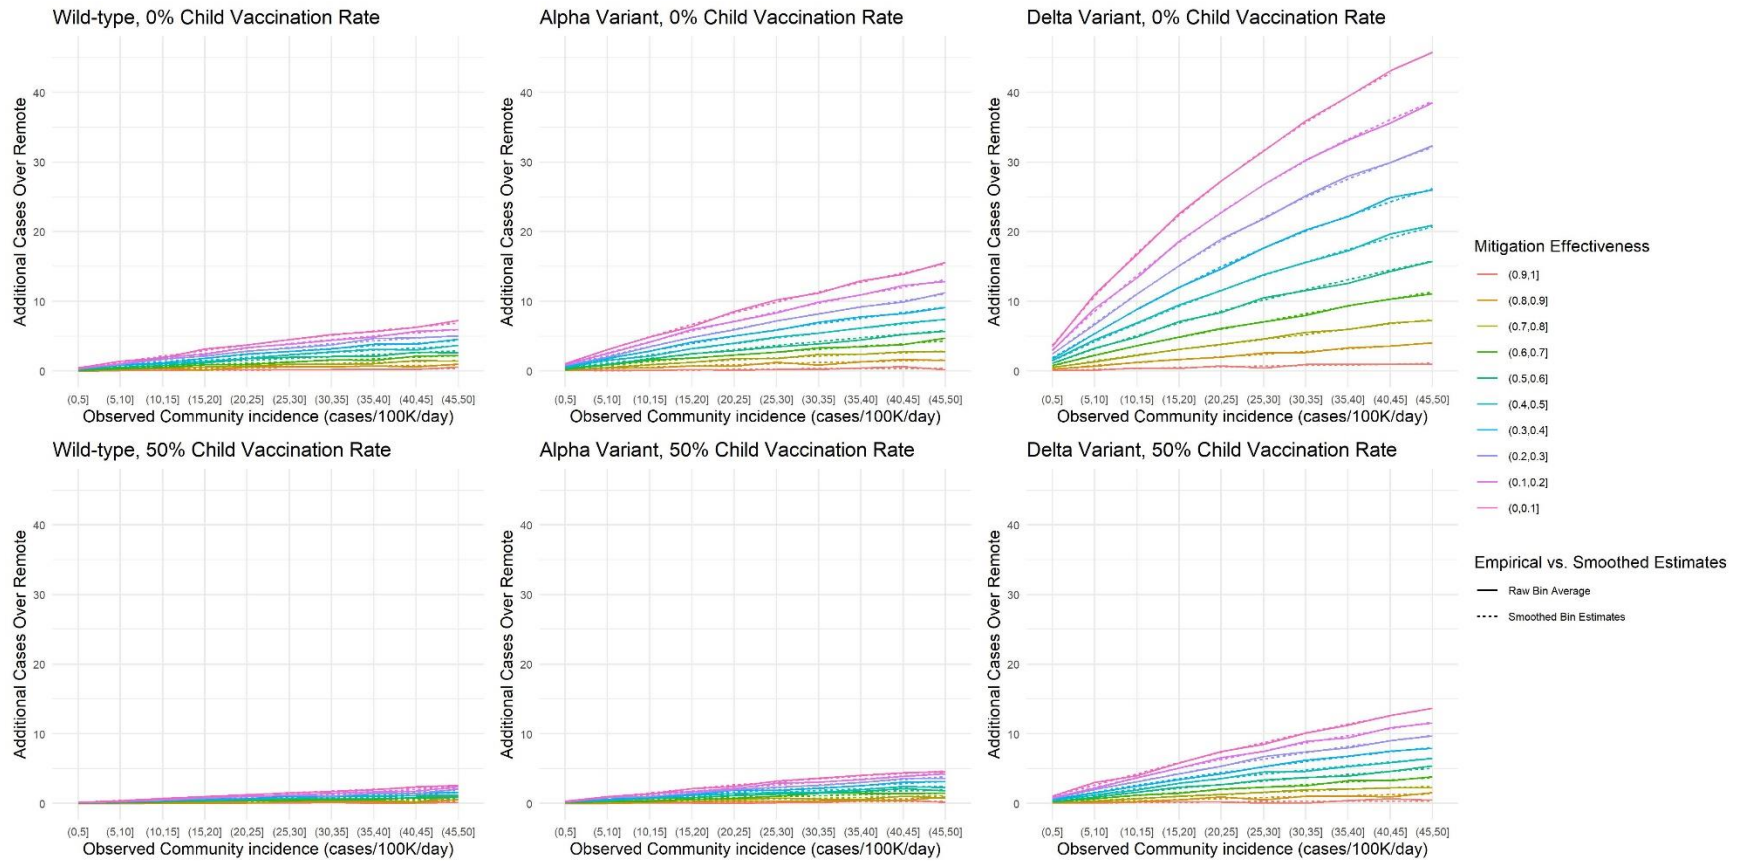

**Figure S6. Model-predicted average number of additional cases over 30 days in the immediate school community (students, educators/staff, and their household members) during in-person instruction compared to remote instruction in the simulated elementary school setting, with 70% ADULT VACCINATION COVERAGE.** This figure includes both the raw binned averages of the model output small bins and the smoothed estimates for each bin (calculated at the midpoint).

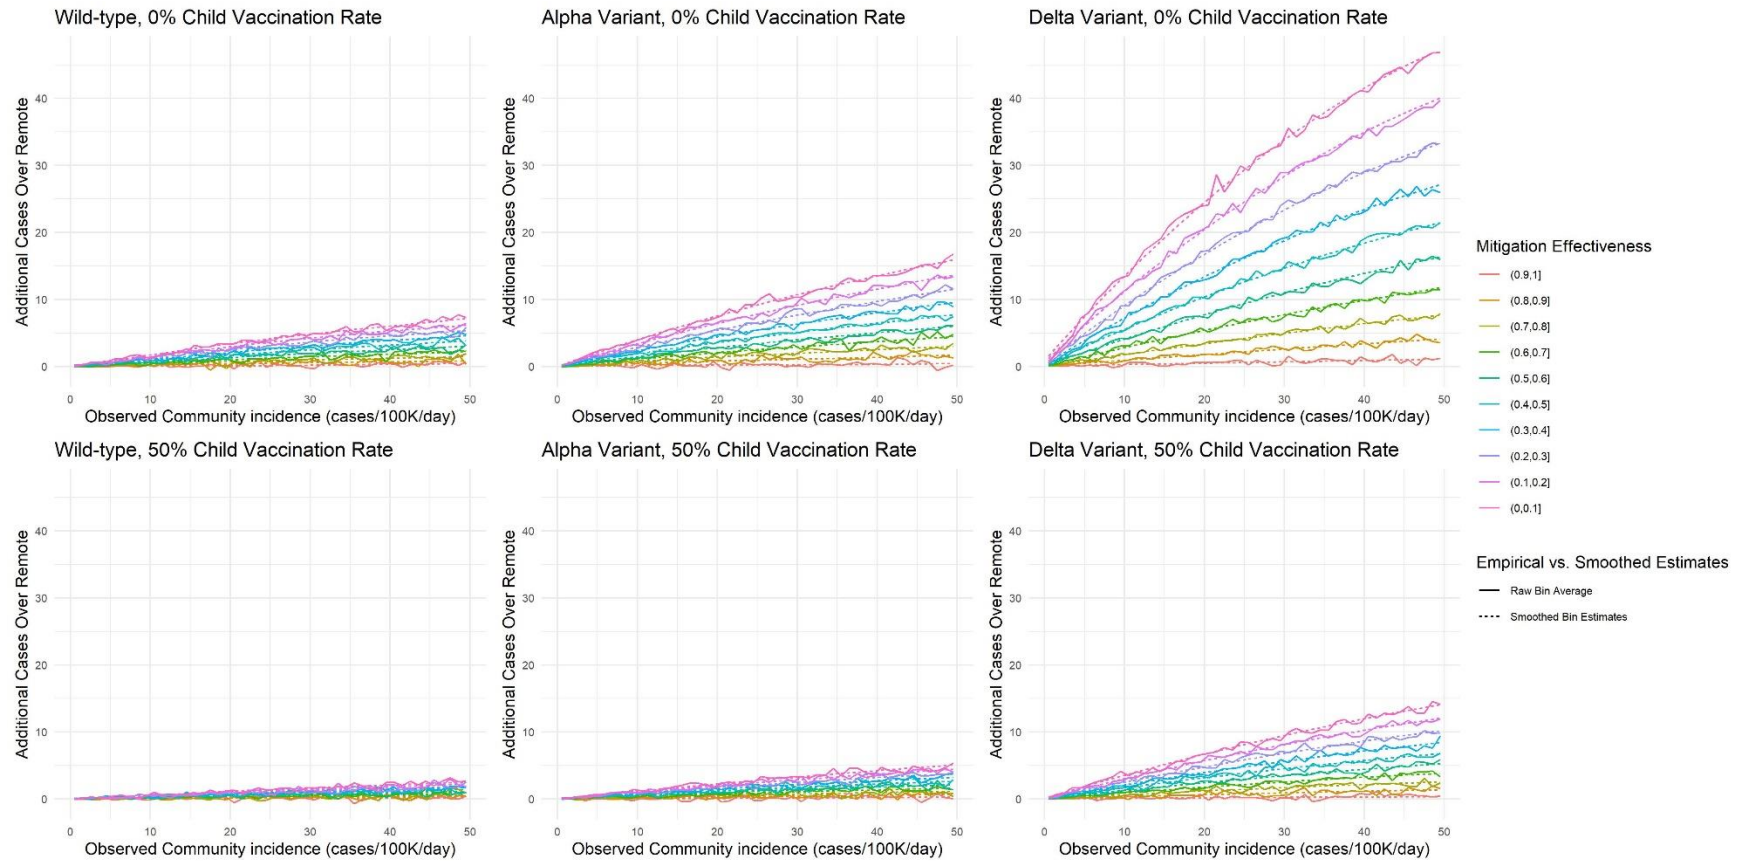

**Figure S7. Model-predicted average number of additional cases over 30 days in the immediate school community (students, educators/staff, and their household members) during in-person instruction compared to remote instruction in the simulated elementary school setting, with 50% ADULT VACCINATION COVERAGE.** This figure includes both the raw binned averages of the model output for large bins and the smoothed estimates for each bin (calculated at the midpoint).

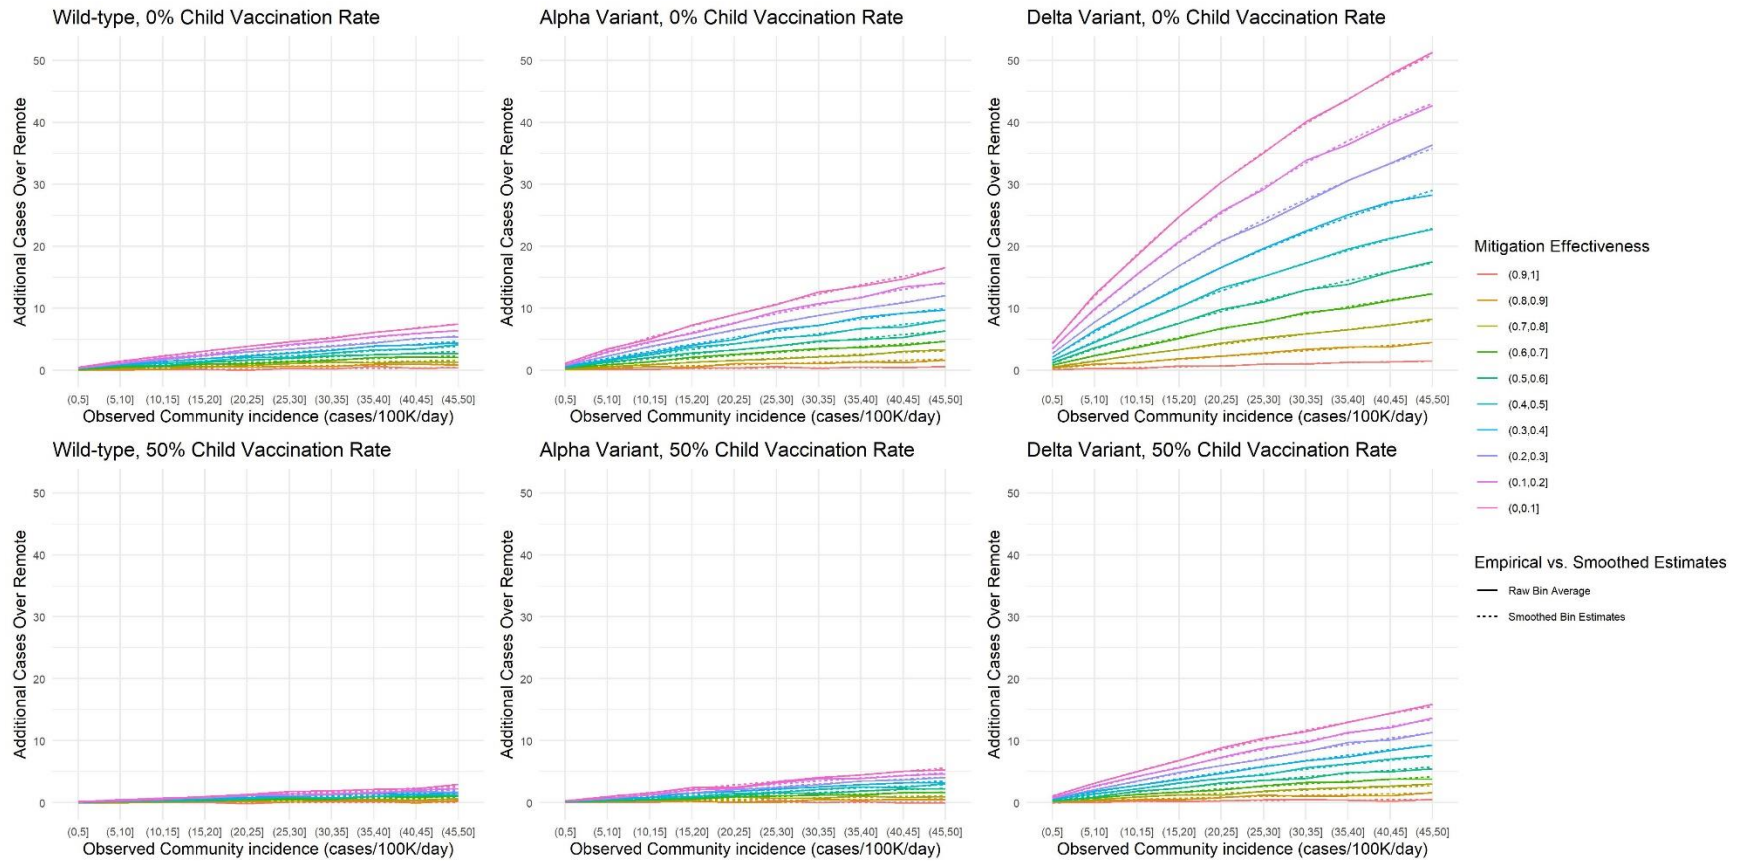

**Figure S8. Model-predicted average number of additional cases over 30 days in the immediate school community (students, educators/staff, and their household members) during in-person instruction compared to remote instruction in the simulated elementary school setting, with 50% ADULT VACCINATION COVERAGE.** This figure includes both the raw binned averages of the model output for small bins and the smoothed estimates for each bin (calculated at the midpoint).

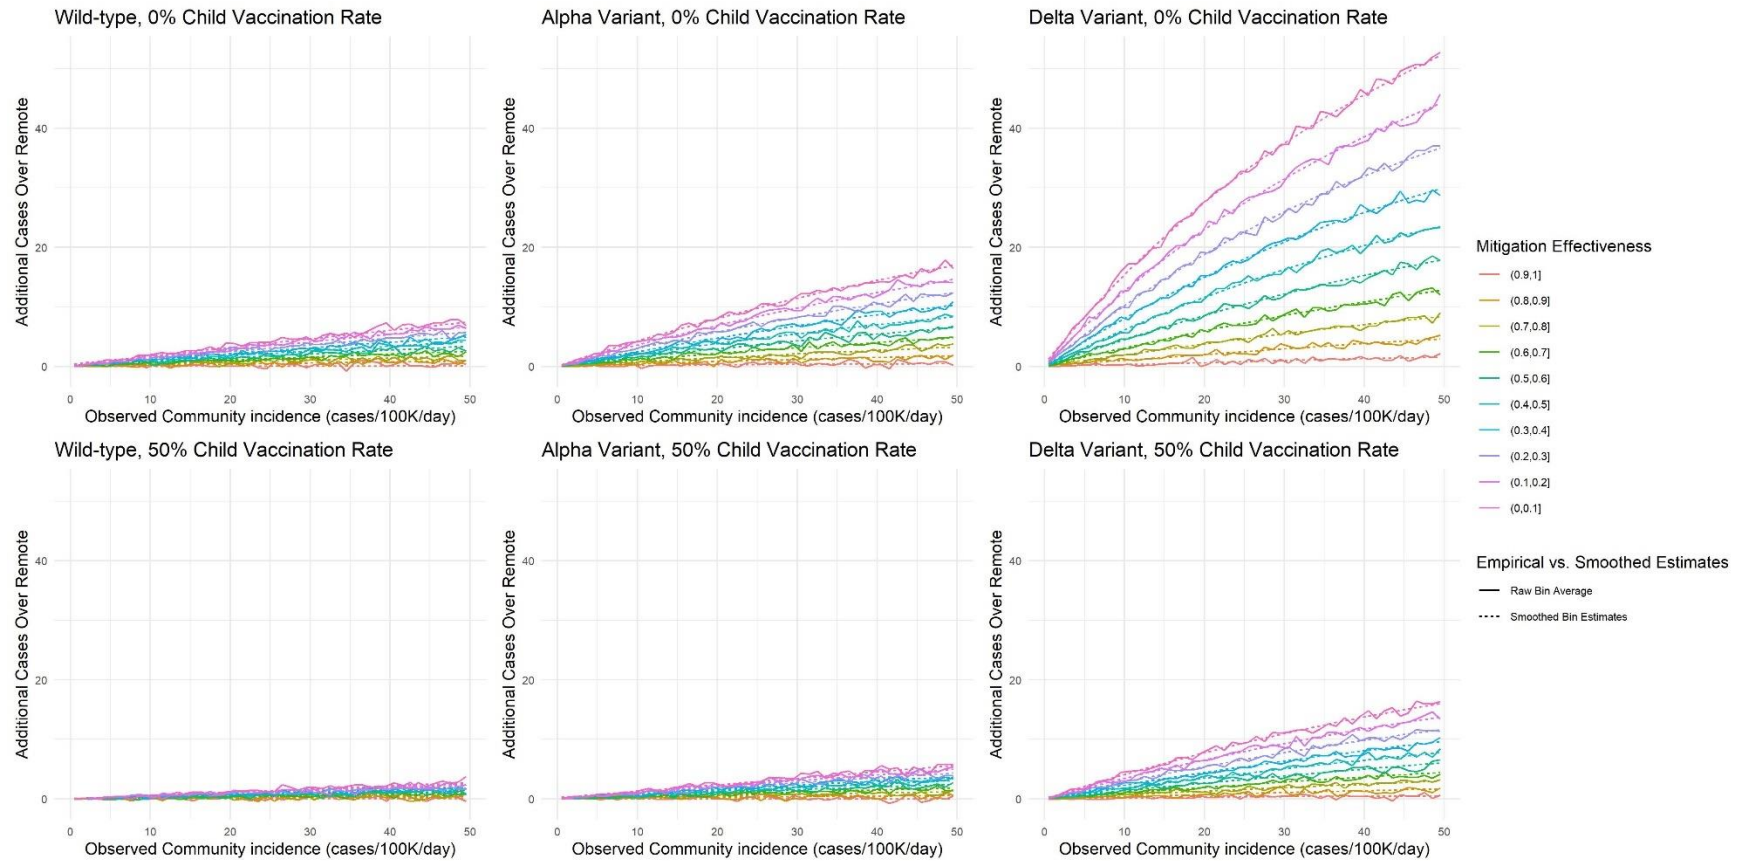

**Figure S9. Model-predicted probability of at least one in-school SARS-CoV-2 transmission over 30 days in a simulated elementary school setting, with 70% ADULT VACCINATION COVERAGE.** This figure is a raw binned heatmap for large bins corresponding to Figure 1.

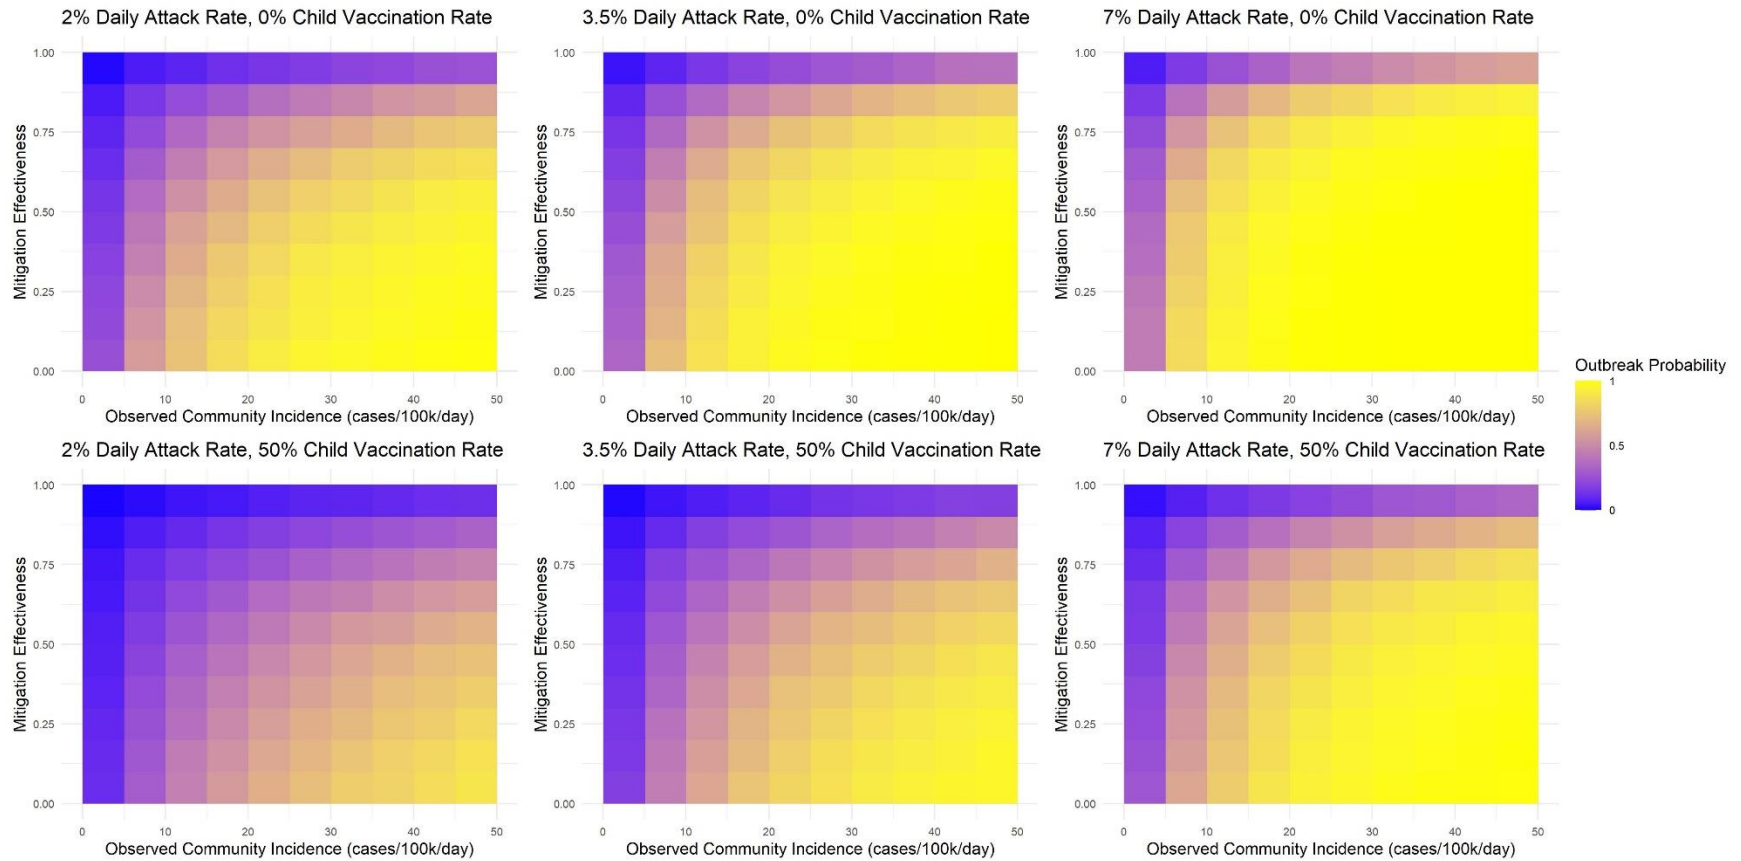



**Figure S10. Model-predicted probability of at least one in-school SARS-CoV-2 transmission over 30 days in a simulated elementary school setting, with 70% ADULT VACCINATION COVERAGE.** This figure is a raw binned heatmap for small bins corresponding to Figure 1.

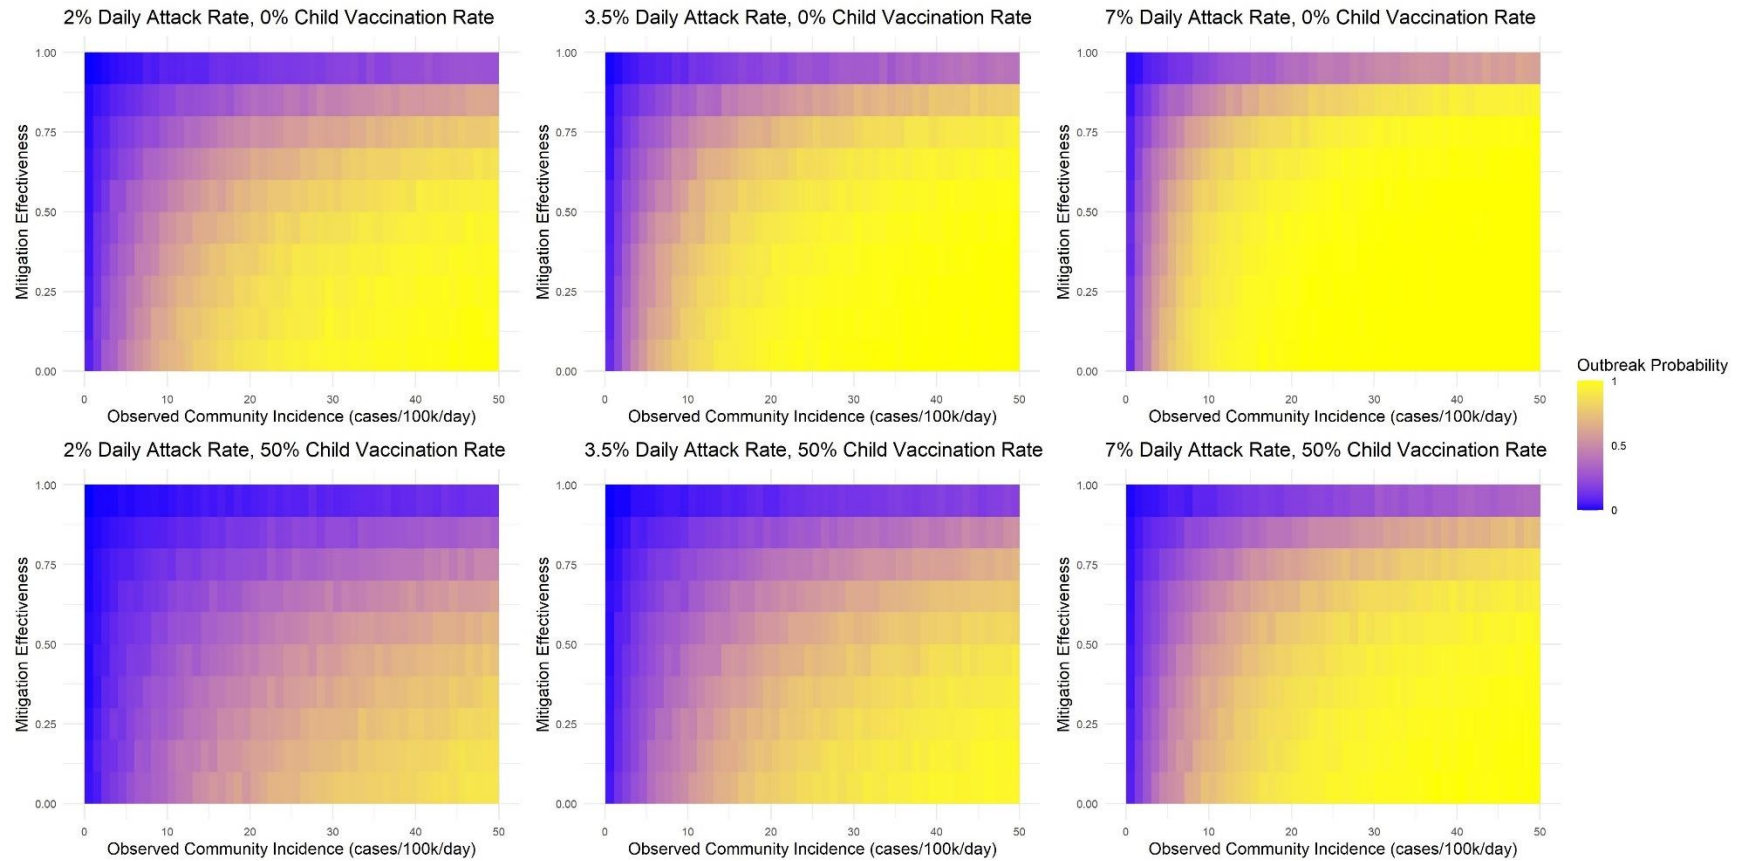



**Figure S11. Model-predicted probability of at least one in-school SARS-CoV-2 transmission over 30 days in a simulated elementary school setting, with 50% ADULT VACCINATION COVERAGE.** This figure is a raw binned heatmap for large bins corresponding to Figure S1.

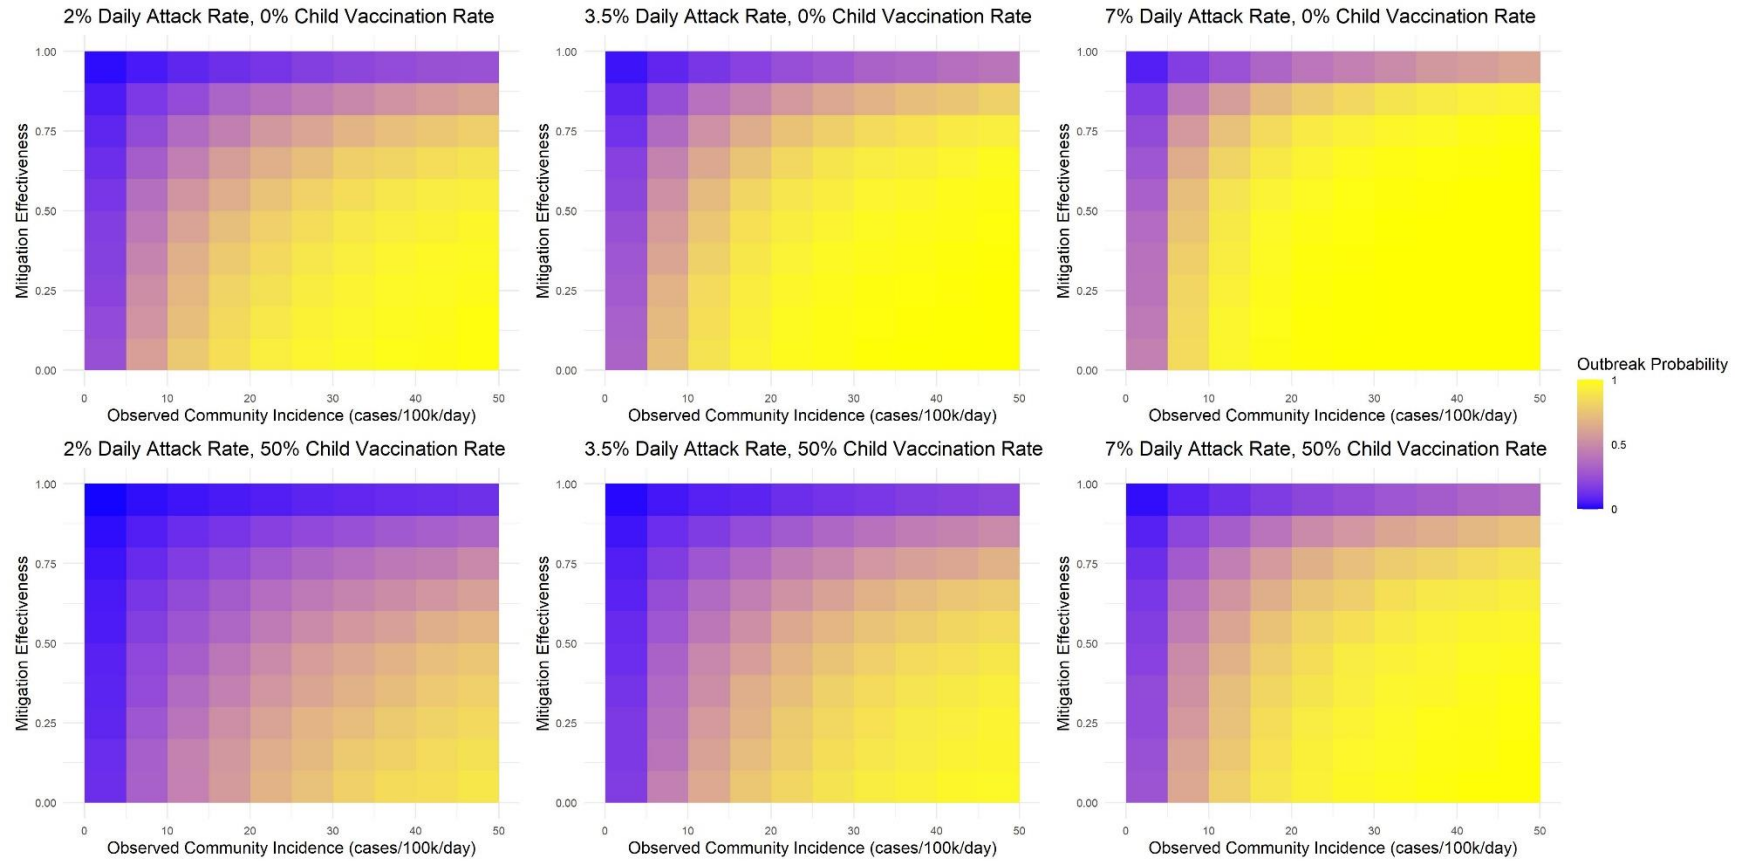

**Figure S12. Model-predicted probability of at least one in-school SARS-CoV-2 transmission over 30 days in a simulated elementary school setting, with 50% ADULT VACCINATION COVERAGE.** This figure is a raw binned heatmap for small bins corresponding to Figure S1.

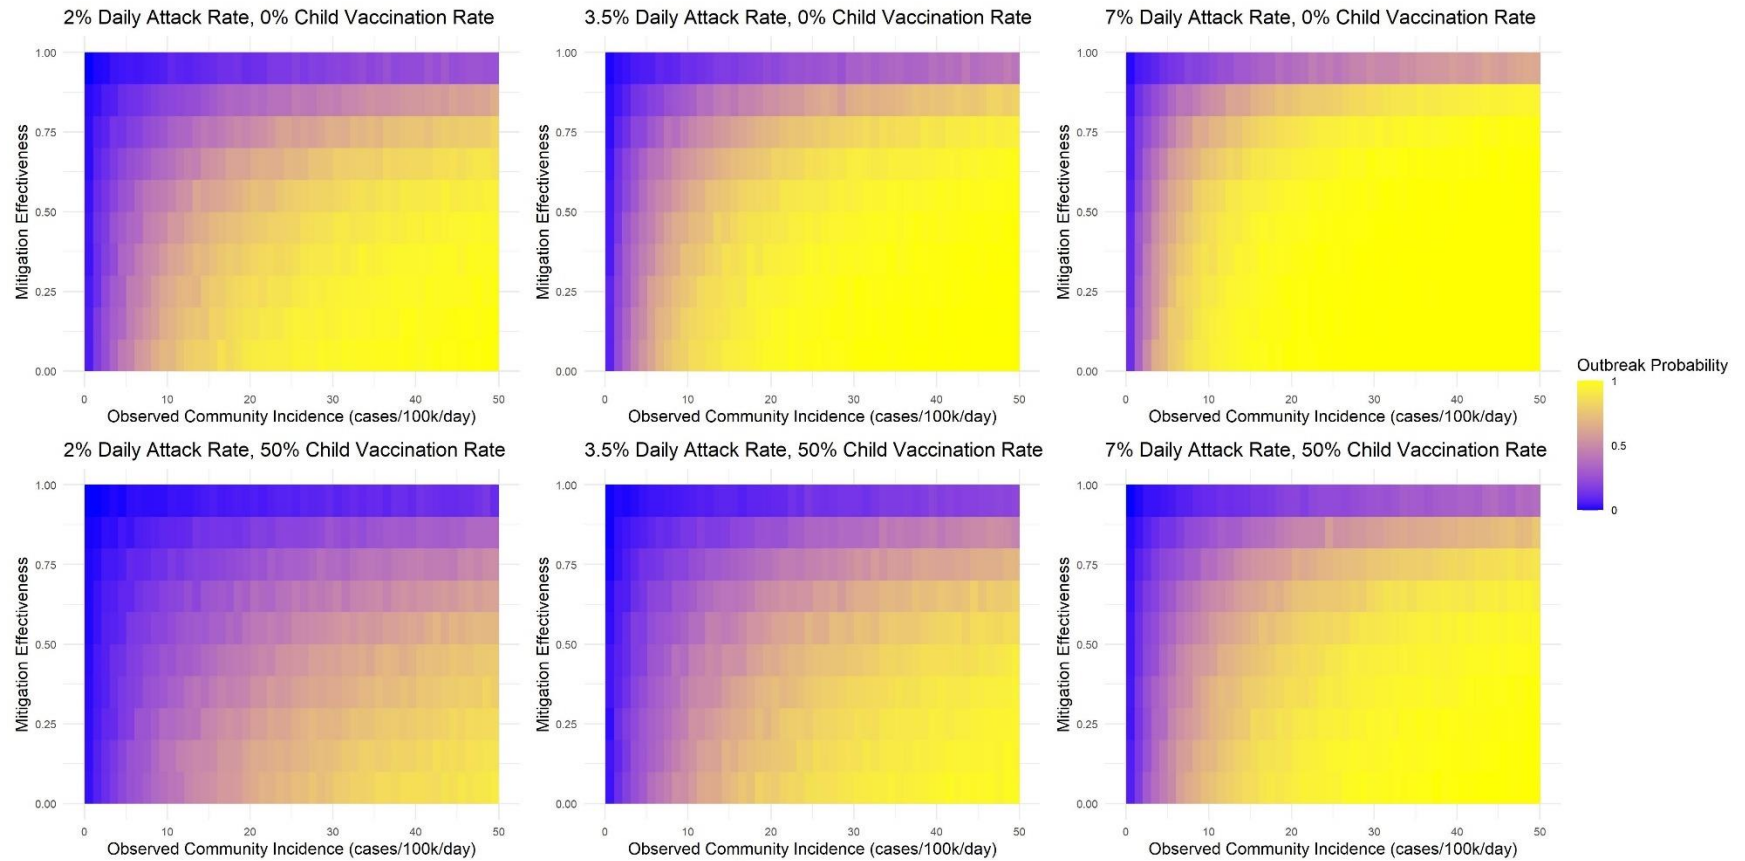

**Figure S13. Model-predicted average number of additional cases over 30 days in the immediate school community (students, educators/staff, and their household members) during in-person instruction compared to remote instruction in the simulated elementary school setting, with 70% ADULT VACCINATION COVERAGE.** This figure is a raw binned heatmap for large bins corresponding to Figure 2.

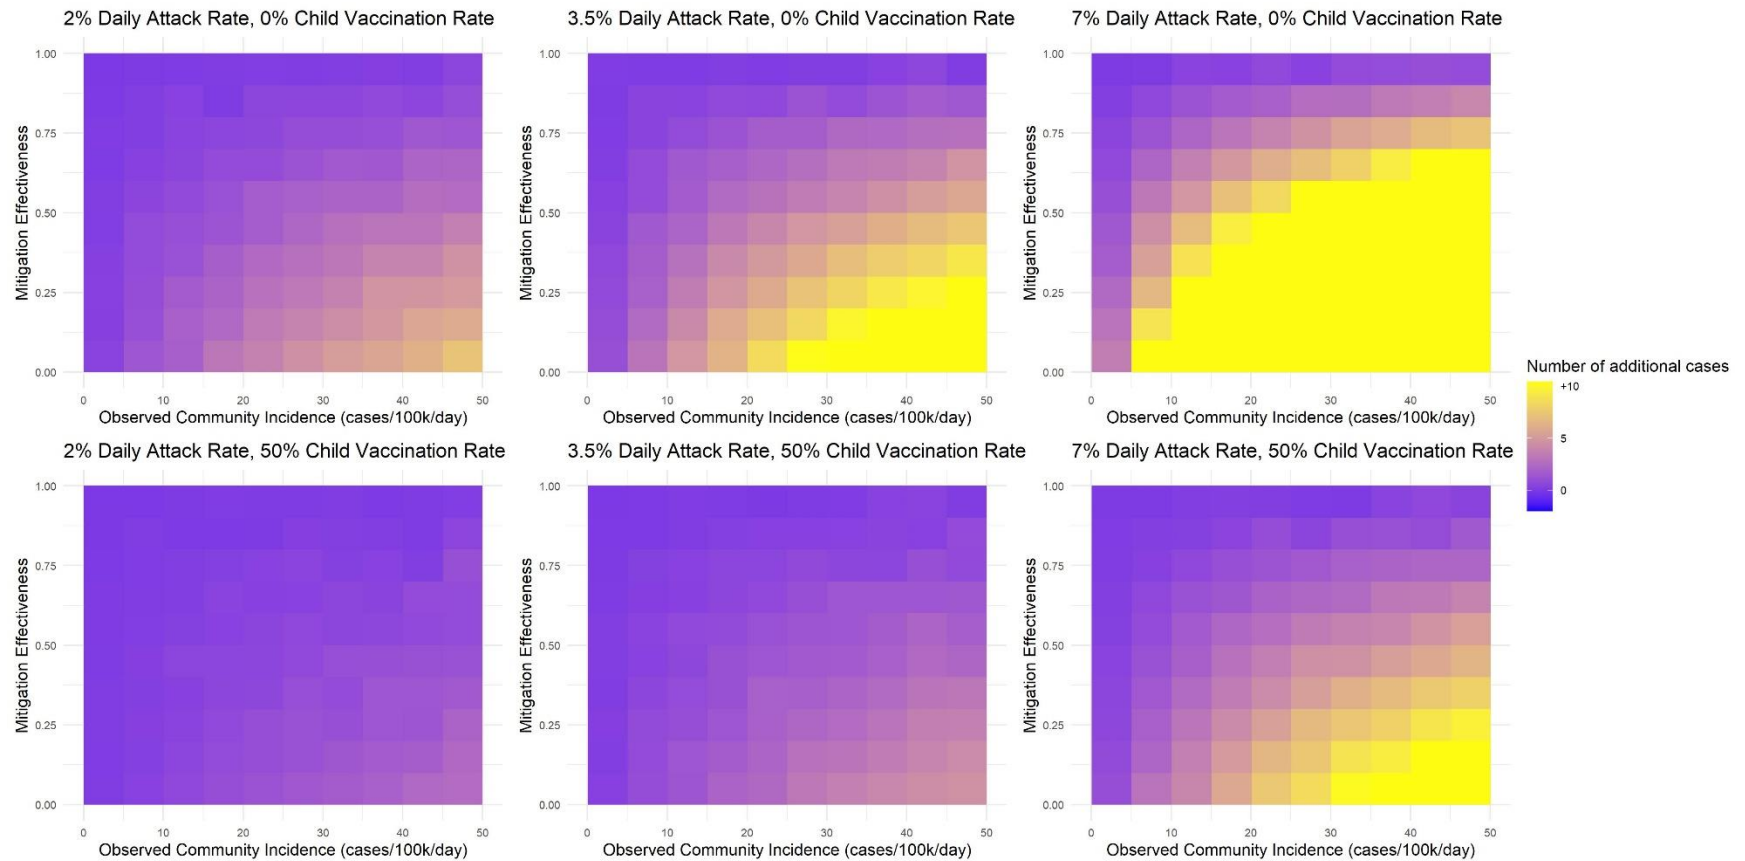

**Figure S14. Model-predicted average number of additional cases over 30 days in the immediate school community (students, educators/staff, and their household members) during in-person instruction compared to remote instruction in the simulated elementary school setting, with 70% ADULT VACCINATION COVERAGE.** This figure is a raw binned heatmap for the small bins corresponding to Figure 2.

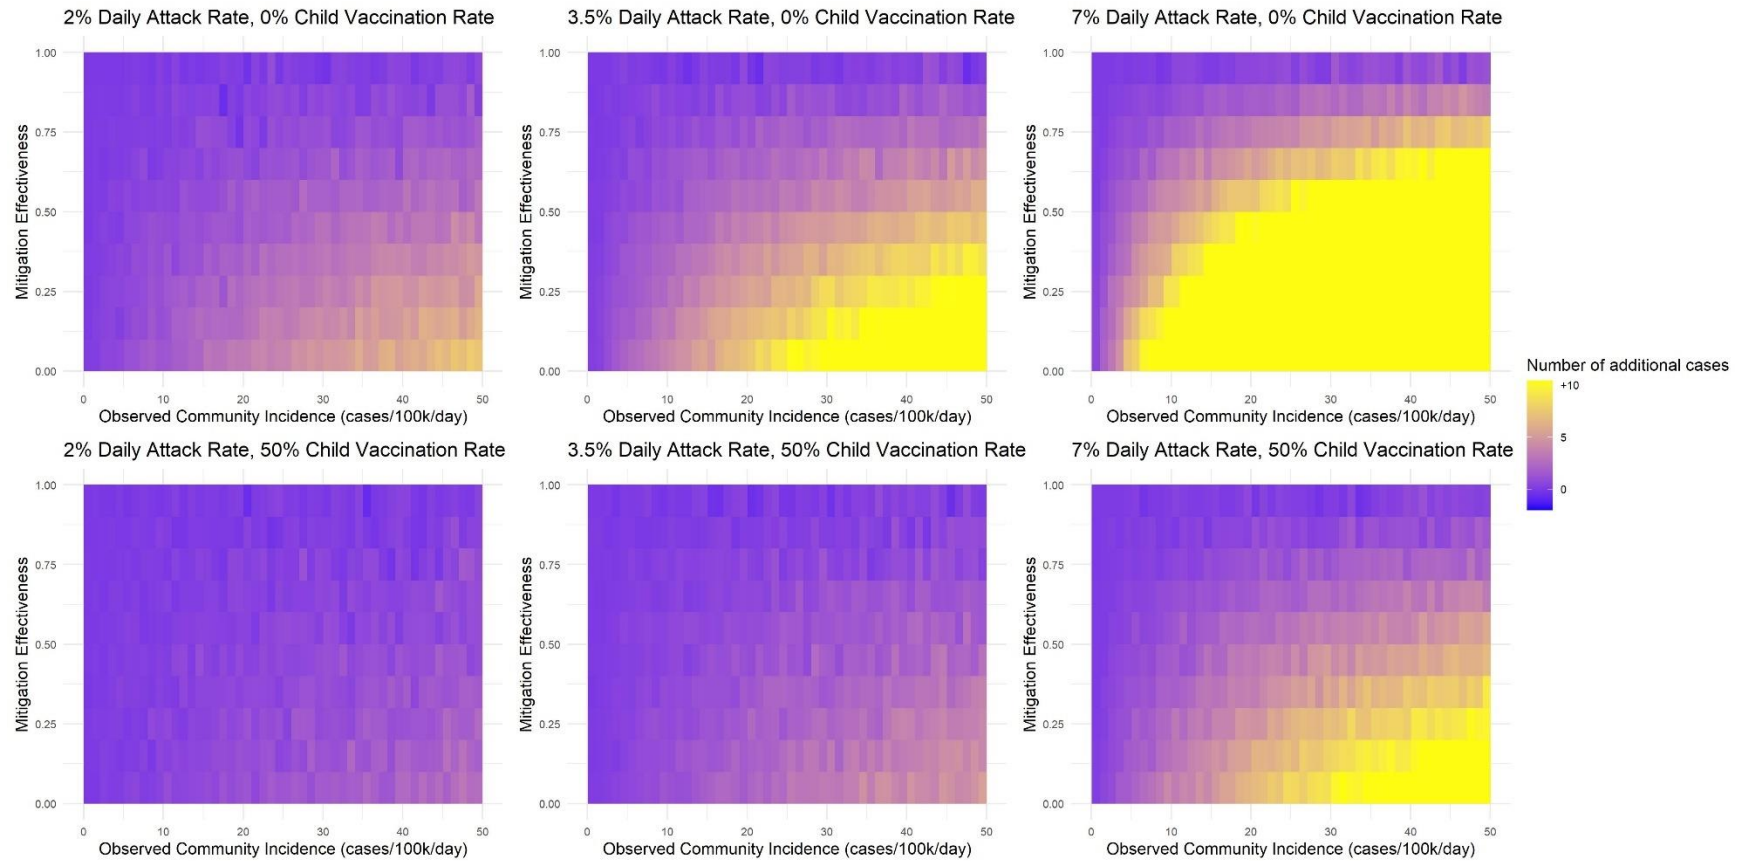

**Figure S15. Model-predicted average number of additional cases over 30 days in the immediate school community (students, educators/staff, and their household members) during in-person instruction compared to remote instruction in the simulated elementary school setting, with 50% ADULT VACCINATION COVERAGE.** This figure is a raw binned heatmap for the large bins corresponding to Figure S2.

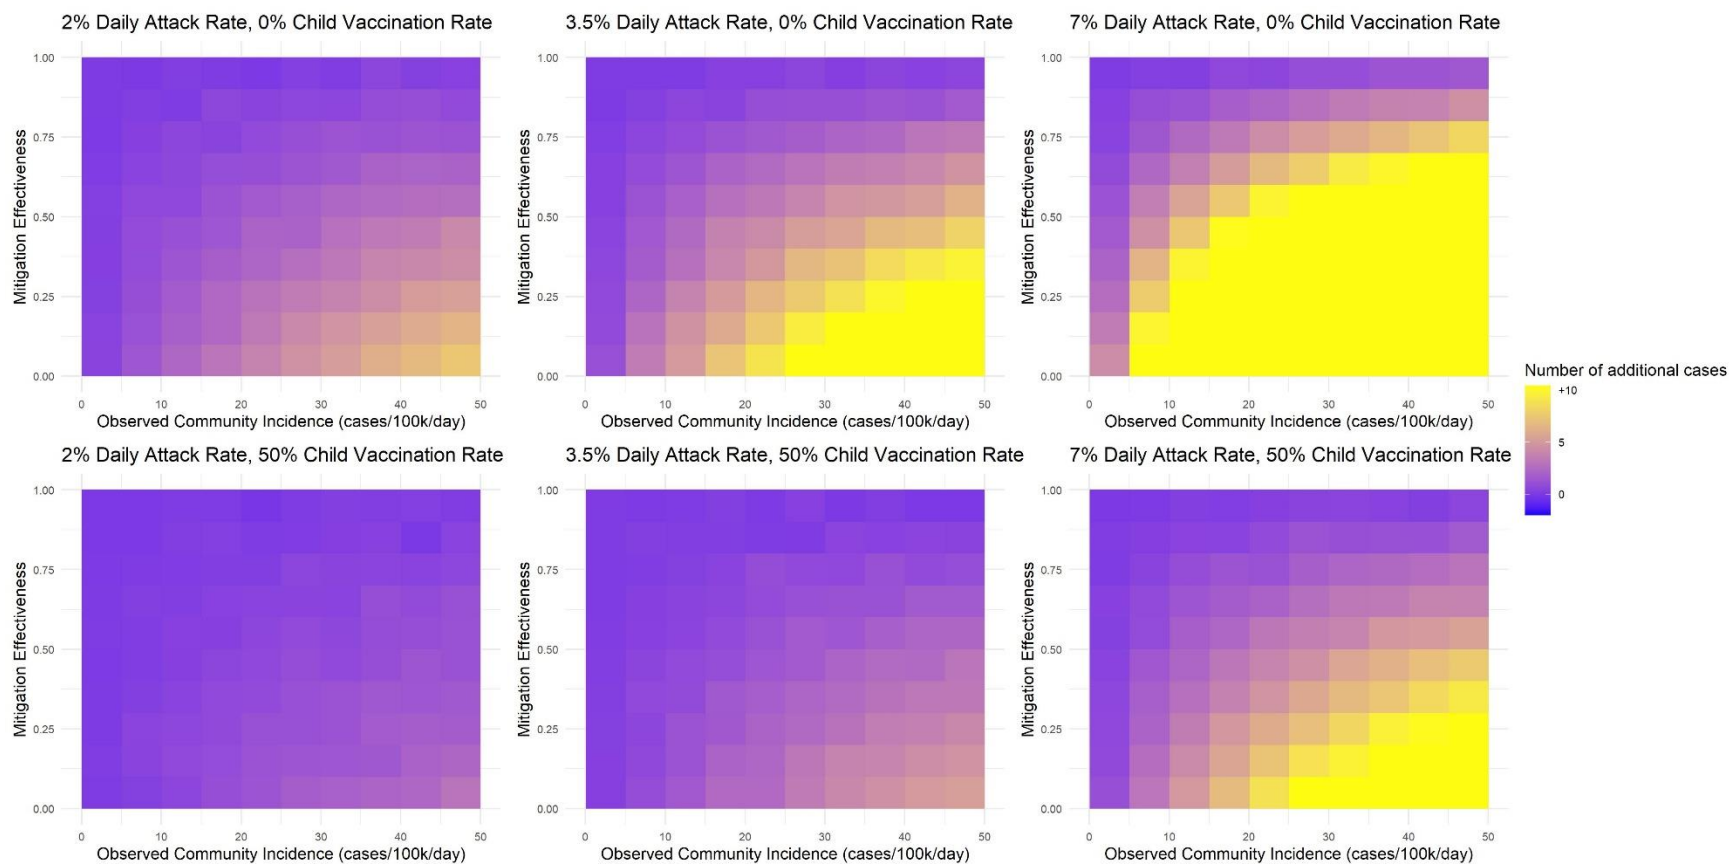

**Figure S16. Model-predicted average number of additional cases over 30 days in the immediate school community (students, educators/staff, and their household members) during in-person instruction compared to remote instruction in the simulated elementary school setting, with 50% ADULT VACCINATION COVERAGE.** This figure is a raw binned heatmap for small bins corresponding to Figure S2.

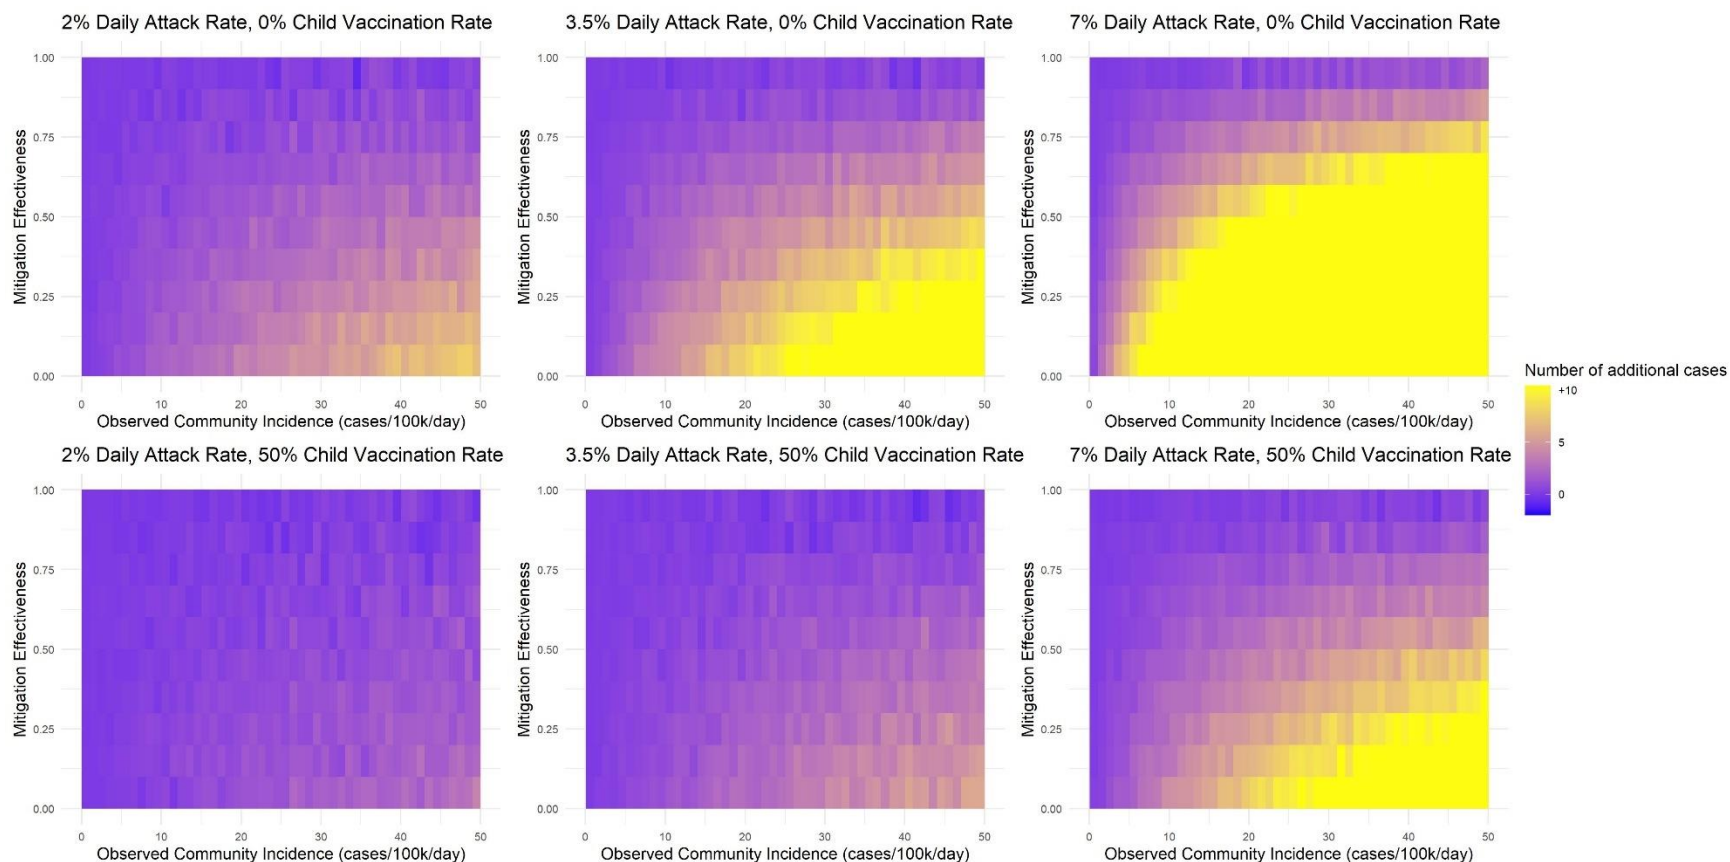



## References

1. Bilinski A, Salomon JA, Giardina J, Ciaranello A, Fitzpatrick MC. Passing the Test: A Model-Based Analysis of Safe School-Reopening Strategies. *Ann Intern Med*. Published online June 8, 2021:M21-0600. doi:10.7326/M21-0600
2. Centers for Disease Control and Prevention. COVID-19 Vaccine Effectiveness Research. Accessed July 16, 2021. <https://www.cdc.gov/vaccines/covid-19/effectiveness-research/protocols.html>
3. Doyle T, Kendrick K, Troelstrup T, et al. COVID-19 in Primary and Secondary School Settings During the First Semester of School Reopening — Florida, August–December 2020. *MMWR Morb Mortal Wkly Rep*. 2021;70(12):437-441. doi:10.15585/mmwr.mm7012e2
4. Davies NG, Abbott S, Barnard RC, et al. Estimated transmissibility and impact of SARS-CoV-2 lineage B.1.1.7 in England. *Science*. 2021;372(6538):eabg3055. doi:10.1126/science.abg3055
5. Public Health England. *SARS-CoV-2 Variants of Concern and Variants under Investigation in England*; 2021. [https://assets.publishing.service.gov.uk/government/uploads/system/uploads/attachment\\_data/file/990339/Variants\\_of\\_Concern\\_VOC\\_Technical\\_Briefing\\_13\\_England.pdf](https://assets.publishing.service.gov.uk/government/uploads/system/uploads/attachment_data/file/990339/Variants_of_Concern_VOC_Technical_Briefing_13_England.pdf)
6. Dougherty K, Mannell M, Naqvi O, Matson D, Stone J. SARS-CoV-2 B.1.617.2 (Delta) Variant COVID-19 Outbreak Associated with a Gymnastics Facility — Oklahoma, April–May 2021. *MMWR Morb Mortal Wkly Rep*. 2021;70(28):1004-1007. doi:10.15585/mmwr.mm7028e2
7. Centers for Disease Control and Prevention. COVID-19 Pandemic Planning Scenarios. Published March 19, 2021. Accessed July 27, 2021. <https://www.cdc.gov/coronavirus/2019-ncov/hcp/planning-scenarios.html>
8. Lemaitre JC, Grantz KH, Kaminsky J, et al. A scenario modeling pipeline for COVID-19 emergency planning. *Sci Rep*. 2021;11(1):7534. doi:10.1038/s41598-021-86811-0
9. Vouriot CVM, Burrige HC, Noakes CJ, Linden PF. Seasonal variation in airborne infection risk in schools due to changes in ventilation inferred from monitored carbon dioxide. *Indoor Air*. 2021;31(4):1154-1163. doi:10.1111/ina.12818
10. Burrige HC, Bhagat RK, Stettler MEJ, et al. The ventilation of buildings and other mitigating measures for COVID-19: a focus on wintertime. *Proc R Soc Math Phys Eng Sci*. 2021;477(2247):20200855. doi:10.1098/rspa.2020.0855
11. Lindsley WG, Derk RC, Coyle JP, et al. Efficacy of Portable Air Cleaners and Masking for Reducing Indoor Exposure to Simulated Exhaled SARS-CoV-2 Aerosols — United States, 2021. *MMWR Morb Mortal Wkly Rep*. 2021;70(27):972-976. doi:10.15585/mmwr.mm7027e1
12. Reiner RC, Barber RM, Collins JK, et al. Modeling COVID-19 scenarios for the United States. *Nat Med*. 2021;27(1):94-105. doi:10.1038/s41591-020-1132-9
13. Brooks JT, Butler JC. Effectiveness of Mask Wearing to Control Community Spread of SARS-CoV-2. *JAMA*. 2021;325(10):998. doi:10.1001/jama.2021.1505
14. Centers for Disease Control and Prevention. Science Brief: Transmission of SARS-CoV-2 in K-12 Schools and Early Care and Education Programs. Centers for Disease Control and Prevention. Published July 9, 2021. Accessed July 28, 2021. [https://www.cdc.gov/coronavirus/2019-ncov/science/science-briefs/transmission\\_k\\_12\\_schools.html](https://www.cdc.gov/coronavirus/2019-ncov/science/science-briefs/transmission_k_12_schools.html)
15. Clapp PW, Sickbert-Bennett EE, Samet JM, et al. Evaluation of Cloth Masks and Modified Procedure Masks as Personal Protective Equipment for the Public During the COVID-19 Pandemic. *JAMA Intern Med*. 2021;181(4):463. doi:10.1001/jamainternmed.2020.8168
16. Centers for Disease Control and Prevention. Guidance for COVID-19 Prevention in K-12 Schools. Published July 9, 2021. Accessed July 16, 2021. <https://www.cdc.gov/coronavirus/2019-ncov/community/schools-childcare/k-12-guidance.html>
17. Falk A, Benda A, Falk P, Steffen S, Wallace Z, Høeg TB. COVID-19 Cases and Transmission in 17 K–12

Schools — Wood County, Wisconsin, August 31–November 29, 2020. *MMWR Morb Mortal Wkly Rep.* 2021;70(4):136-140. doi:10.15585/mmwr.mm7004e3

18. Zimmerman KO, Akinboyo IC, Brookhart MA, et al. Incidence and Secondary Transmission of SARS-CoV-2 Infections in Schools. *Pediatrics.* 2021;147(4). doi:10.1542/peds.2020-048090
